## **LRRC15 is an inhibitory receptor blocking SARS-CoV-2 spike-mediated entry *in trans***

Jaewon Song<sup>1\*</sup>, Ryan D. Chow<sup>2\*</sup>, Mario Pena-Hernandez<sup>3,4\*</sup>, Li Zhang<sup>1</sup>, Skylar A. Loeb<sup>1</sup>, Eui-Young So<sup>5</sup>, Olin D. Liang<sup>5</sup>, Craig B. Wilen<sup>3,4#</sup>, Sanghyun Lee<sup>1,6#</sup>

5

<sup>1</sup> Department of Molecular Microbiology and Immunology, Division of Biology and Medicine, Brown University, Providence, Rhode Island, USA

<sup>2</sup> Department of Genetics, Yale School of Medicine, New Haven, Connecticut, USA.

<sup>3</sup> Department of Laboratory Medicine, Yale University, New Haven, Connecticut, USA.

10 <sup>4</sup> Department of Immunobiology, Yale University, New Haven, Connecticut, USA.

<sup>5</sup> Division of Hematology/Oncology, Department of Medicine, Rhode Island Hospital, Warren Alpert Medical School of Brown University, Providence, Rhode Island, USA

<sup>6</sup> Lead contact

15 # Correspondence to: Craig B. Wilen, [craig.wilen@yale.edu](mailto:craig.wilen@yale.edu) or Sanghyun Lee, [sanghyun\\_lee@brown.edu](mailto:sanghyun_lee@brown.edu)

\* These authors contributed equally to this work.

20

## ABSTRACT

SARS-CoV-2 infection is mediated by the entry receptor ACE2. Although attachment factors and co-receptors facilitating entry are extensively studied, cellular entry factors  
25 inhibiting viral entry are largely unknown. Using a *surfaceome* CRISPR activation screen, we identified human LRRC15 as an inhibitory receptor for SARS-CoV-2 entry. LRRC15 directly binds to the receptor-binding domain (RBD) of spike protein with a moderate affinity and inhibits spike-mediated entry. Analysis of human lung single cell RNA sequencing dataset reveals that expression of LRRC15 is primarily detected in fibroblasts  
30 and particularly enriched in pathological fibroblasts in COVID-19 patients. *ACE2* and *LRRC15* are not co-expressed in the same cell types in the lung. Strikingly, expression of LRRC15 in ACE2-negative cells blocks spike-mediated viral entry in ACE2+ cell *in trans*, suggesting a protective role of LRRC15 in a physiological context. Therefore, LRRC15 represents an inhibitory receptor for SARS-CoV-2 regulating viral entry *in trans*.

35

40

**Keywords:** SARS-CoV-2, COVID-19, viral entry, LRRC15, inhibitory receptor.

## INTRODUCTION

Severe acute respiratory syndrome coronavirus 2 (SARS-CoV-2) is the causative  
45 agent of coronavirus disease 19 (COVID-19), representing a global health threat [1, 2].  
SARS-CoV-2 belongs to the  $\beta$ -coronavirus family along with severe acute respiratory  
syndrome coronavirus (hereafter SARS-CoV-1) and middle east respiratory syndrome  
coronavirus (MERS-CoV) [3, 4]. Like SARS-CoV-1, SARS-CoV-2 utilizes angiotensin-  
converting enzyme 2 (ACE2) as a primary entry receptor [5, 6]. The viral structural protein  
50 spike (S), anchored on the surface of the viral envelope as homotrimers, binds to ACE2  
and mediates the cellular entry of this virus [7]. The ectodomain of spike protein consists  
of the S1 and S2 subunits. The S1 subunit is comprised of the N-terminal domain (NTD)  
and the receptor binding domain (RBD) [8]. The RBD of spike protein directly binds to  
ACE2, which induces a conformational change that facilitates virus fusion either with  
55 endosomal membrane or with the plasma membrane [6, 9, 10]. This fusion event releases  
the SARS-CoV-2 genome into the cytoplasm [11, 12]. Importantly, the interaction  
between the RBD of spike and ACE2 is critical to determine several key features of SARS-  
CoV-2 infection. The high affinity interface between the RBD and ACE2 is associated with  
higher infectivity of SARS-CoV-2 compared to SARS-CoV-1 [13] and breaks a barrier of  
60 susceptibility of SARS-CoV-2 in murine hosts [14, 15]. Spike protein, specifically the RBD,  
is the primary target antigen for COVID vaccines in the market and interfering with the  
interface between RBD and ACE2 is the action mechanism of the majority of existing  
therapeutic antibodies [16], indicating the importance of RBD and its binding to the cellular  
receptor for controlling SARS-CoV-2.

65            Thus far, several cellular factors have been identified to facilitate cellular entry of  
SARS-CoV-2. However, it is unclear whether there are any cellular receptors that inhibit  
viral entry. Previous studies indicate that cleavage of spike protein by cellular proteases  
such as transmembrane protease serine 2 (TMPRSS2), cathepsins, and furin facilitates  
the entry of SARS-CoV-2 [9, 11, 17, 18]. Several cellular surface proteins or glycans  
70            facilitate viral entry by acting as an attachment factor, which includes neuropilin-1 [19, 20],  
heparan sulfate [21], and C-type lectins [22]. Alternative entry factors have been  
proposed such as AXL [23] and CD147 [24]. However, it remains to be elucidated whether  
any cellular entry factors regulate viral entry in a different manner.

              In this study, we employed a screening method using the CRISPR activation  
75            (CRISPRa) technique. We generated a focused CRISPRa library, named *surfaceome*,  
that covers ~6000 of all known/predicted surface proteins on the cellular plasma  
membrane. The *surfaceome* screening with the SARS-CoV-2 spike protein revealed that  
human LRRC15 (leucine rich repeat containing 15) is a novel inhibitory receptor for SARS-  
CoV-2.

## RESULTS

### A *surfaceome* CRISPR activation screen identified cellular receptors for spike protein of SARS-CoV-2

To identify host factors that regulate SARS-CoV-2 entry, we performed the *surfaceome* CRISPRa screen and investigated which cellular proteins regulate spike binding to cells. We specifically selected approximately 6000 genes encoding plasma membrane proteins that contain either single or multiple transmembrane domains or are associated with the plasma membrane. We designed a CRISPR activation library consisting of four activating single guide RNAs (sgRNAs) per gene and 1,000 non-targeting control sgRNAs (**S1A Fig**). The screen was performed in a human melanoma cell line, A375, as this cell line does not express endogenous *ACE2* and does not interact with SARS-CoV-2 spike protein without ectopic expression of *ACE2* [21]. A375 cells containing catalytically “dead” Cas9 (dCas9) were transduced with the sgRNA library and selected to produce a pool of cells with induced expression of individual surface proteins. We measured the binding of Fc-tagged S1 subunit of SARS-CoV-2 spike to the cells by flow cytometry. Cells exhibiting high fluorescent signal intensity were sorted and subjected to genomic DNA extraction and sgRNA sequencing (**Fig 1A**). Two biologically independent screen results indicated two very distinct hits; *ACE2* and *LRRC15* (**Fig 1B**). *ACE2* is reported to have a high affinity for the spike protein [6, 10]. *LRRC15* is a leucine-rich repeat domain containing protein which is an orphan cancer-associated protein [25, 26]. There is no reported role of *LRRC15* in SARS-CoV-2. An IgG isotype control and anti-CD45 staining identified IgG receptor genes (*FCGR2C*, *FCGR3B*) and *CD45*-encoding gene, *PTPRC*, as the top hit, respectively, confirming that the *surfaceome*

CRISPR screening efficiently identifies cellular receptors for targeted proteins (**Fig 1B, S1B Fig**).

### **LRRC15 directly interacts with the spike via the receptor-binding domain**

110 To validate the screening result, we utilized two different human cell lines, A375 and HeLa. These two cell lines do not express endogenous *ACE2* and are not susceptible to SARS-CoV-2 without ectopic expression of *ACE2* [21, 27]. A375 and HeLa cells were transduced with two individual sgRNAs for *LRRC15* and a single sgRNA for *ACE2* to induce gene expression (**S2A-B Fig**). LRRC15-induced and ACE2-induced cells bound  
115 to the S1-Fc protein. The signal intensity in ACE2-induced cells was stronger than that of the LRRC15-induced cells. (**Fig 2A**). A similar pattern of protein-interaction was observed in HeLa cells (**Fig 2B, S2B Fig**).

The interaction between LRRC15 and spike was further examined in a cell-free interaction model using recombinant proteins. An ELISA assay using recombinant  
120 LRRC15 and full-length spike indicated that LRRC15 directly interacts with the spike protein ( $K_D = 109$  nM). The affinity between LRRC15 and the spike seems to be weaker than that of ACE2 and spike (**Fig 2C**). Interaction with spike proteins of different SARS-CoV-2 variants was confirmed. Recombinant full-length spike proteins of  $\alpha$  (B.1.1.7),  $\beta$  (B.1.351),  $\gamma$  (P.1),  $\delta$  (B.1.617.2), and  $\iota$  (B.1.526) variants were tested and LRRC15  
125 interacted with all of these spike proteins with similar affinity (**S2C Fig**).

ACE2 is known to interact with the spike protein via the RBD but does not interact with the NTD [28]. Interestingly, we identified that LRRC15 interacts with the spike in a similar way. Interaction assays in cells and in a cell-free assay using ELISA indicated that

the RBD is sufficient to represent the interaction between LRRC15 and spike with a similar  
130 affinity compared to full-length S1 (**Fig 2D-E**). Next, we examined whether this interaction  
is specific to SARS-CoV-2 or conserved in other  $\beta$  coronaviruses. The ELISA assay using  
recombinant RBD protein of SARS-CoV-1 and MERS-CoV showed that LRRC15 binds  
to spike of SARS-CoV-1 with similar affinity but does not interact with spike of MERS-  
CoV (**S2D Fig**). These results indicate that LRRC15 is a novel cellular binding protein for  
135 the spike protein of SARS-CoV-1 and -2 and directly interacts with the spike via the RBD.

### **LRRC15 suppresses entry of SARS-CoV-2**

We next investigated whether LRRC15 regulates the entry process of SARS-CoV-  
2. Pseudotyping a heterologous viral envelope with spike protein has been utilized to  
140 study the entry process of SARS-CoV-2 [29, 30]. To monitor viral entry, we utilized a  
replication-incompetent VSV pseudovirus system that harbors the spike protein of SARS-  
CoV-2 on the viral envelope and expresses GFP reporter [31]. The LRRC15-induced  
A375 or HeLa cells were infected with the pseudovirus and the infectivity was monitored  
by flow cytometry. Wildtype control A375 and HeLa cells were not susceptible to the  
145 spike-pseudotyped virus, consistent with previous reports [21, 27] (**S3A-B Fig**). ACE2 but  
not LRRC15 expression was sufficient to support viral entry. The VSV-G-coated  
pseudovirus entered into all tested cell lines with a similar efficiency (**S3A-B Fig**). These  
data suggest that LRRC15 does not function as an entry receptor for SARS-CoV-2.

To examine whether LRRC15 regulates ACE2-mediated viral entry, we first  
150 generated a clonal HeLa cell line stably expressing ACE2, designated as HeLa-ACE2,  
and confirmed the high surface expression of ACE2 and susceptibility to SARS-CoV-2

spike-pseudovirus (**S3C-D Fig**). Using this cell line, we induced LRRC15 expression with two different sgRNAs and measured the efficiency of pseudoviral entry. The increased LRRC15 expression resulted in a significant decrease in the spike-pseudotyped VSV entry, while the induction of an unrelated gene, CD45, showed similar infectivity compared to the mock control (**Fig 3A, S3E Fig**). The entry of VSV-G-pseudotyped virus was not affected by LRRC15 gene induction, indicating the LRRC15-mediated inhibition is specific to the entry of SARS-CoV-2. The inhibitory function of LRRC15 was confirmed by ectopic overexpression of its cDNA as well (**Fig 3B, S3F Fig**). Of note, a larger reduction in viral entry was observed with the sgRNA-mediated gene induction, likely due to its higher gene expression of LRRC15 on cells compared to the cDNA overexpression (**S3E-F Fig**). The suppressed viral entry was observed in other pseudotyped viruses containing the spike of multiple variants of SARS-CoV-2 (i.e.,  $\alpha$ ,  $\beta$ ,  $\gamma$ , and  $\delta$ ) and SARS-CoV-1 (**Fig 3C-D**), as expected by their similar binding affinities with LRRC15 (**S2C-D Fig**). Therefore, these data indicate that LRRC15 suppresses spike-mediated viral entry, and the binding and suppression activity are specific to SARS-CoV-2 and SARS-CoV-1.

### **LRRC15 accumulates cell-attached viruses on the membrane and does not compete with ACE2**

As SARS-CoV-2 entry is primarily dependent on ACE2, we assessed whether LRRC15 alters protein expression of ACE2. In HeLa-ACE2 cells, the level of ACE2 surface expression was unaltered by either sgRNA-mediated gene induction or ectopic cDNA expression of LRRC15 (**Fig 4A**). Interestingly, we found that spike-coated viruses were sequestered on the cellular surface of LRRC15-expressing cells. In the attachment



175 assay, we measured the attachment to cells by incubating spike-pseudotyped viruses and  
cells on ice, allowing attachment on the cell membrane and preventing internalization of  
viruses. As expected, the binding of SARS-CoV-2 spike-pseudotyped viruses to cells was  
dependent on ACE2 expression and the binding was not altered by inducing a control  
gene, CD45. Importantly, viruses were highly accumulated in LRRC15-induced HeLa-  
180 ACE2 cells (i.e., 3 to 5.5-fold increases in viral copies) compared to the control (**Fig  
4B**). Preincubation of soluble LRRC15 protein with spike-pseudotyped viruses partly  
blocked the viral entry in HeLa-ACE2 cells at high concentration, while preincubation with  
soluble ACE2 completely blocked the viral entry (**Fig 4C**), suggesting that the inhibitory  
function of LRRC15 may require localization to the cellular membrane and/or the cytosolic  
185 domain of LRRC15 for its functional efficiency. In summary, these results suggest that  
LRRC15 inhibits SARS-CoV-2 entry by restricting the internalization of virions into the cell  
through binding to the spike protein on the viral envelope.

To test whether LRRC15 directly binds to ACE2, we utilized His-tagged-LRRC15,  
SARS-CoV-2 spike protein, and MERS-CoV spike protein and assessed their interactions  
190 with Fc-tagged ACE2. Recombinant ACE2 did not show detectable binding to  
recombinant LRRC15 protein or the MERS-CoV spike whereas binding to SARS-CoV-2  
spike was confirmed with high affinity (**S4A Fig**) [32]. Since both ACE2 and LRRC15 bind  
to the RBD of SARS-CoV-2 spike, we investigated whether LRRC15 competes with ACE2  
for binding on the spike protein. The interaction between ACE2 and SARS-CoV-2 spike  
195 was measured in the presence of recombinant LRRC15 protein. Even at high  
concentrations, LRRC15 did not affect the spike-ACE2 binding (**Fig 4D**). We confirmed  
SARS-CoV-2 spike S1-Fc binding to HeLa-ACE2 cells was not altered by gene-induction

or ectopic expression of *LRRC15* (**S4B Fig**). Taken together, ACE2-mediated viral entry of SARS-CoV-2 is suppressed by *LRRC15* on the cell membrane through its direct  
200 binding to the RBD without competition between *LRRC15* and ACE2.

***LRRC15* is expressed in distinct cell types in human lung and is associated with pathological fibroblasts.**

To better understand the function of *LRRC15* in a physiologic context, we first  
205 explored its expression in human lung samples unaffected by SARS-CoV-2. Two independent single-cell RNA-sequencing (scRNA-seq) datasets of non-COVID-19 human lungs [33, 34] revealed that *LRRC15* was predominantly expressed in a subset of fibroblasts and lymphatic endothelial cells (**S5A-B Fig**). For instance, in the Tissue Stability Cell Atlas dataset, a significant proportion of fibroblasts and lymphatic endothelial  
210 cells expressed *LRRC15* (**S5B Fig**). Of note, the cell types that expressed *LRRC15* did not co-express *ACE2*.

Having defined fibroblasts and lymphatic endothelial cells as the main cell types in the lung that express *LRRC15*, we sought to explore if any clinical features were associated with *LRRC15* expression in the lung. Utilizing the large cohort of human lung  
215 RNA-seq samples from the Genotype-Tissue Expression project (GTEx) [35], we constructed a multivariable regression model between *LRRC15* expression and various clinical factors as predictors. Specifically, we included age, sex, diabetes (type 1 or type 2), hypertension, body mass index (BMI), smoking, and ventilator status at time of death as independent variables in the model. We observed that *LRRC15* expression was not  
220 significantly associated with age, sex, hypertension, BMI, smoking, or type 1 diabetes

(**S5C Fig**). Strikingly, *LRRC15* expression was significantly decreased in patients that were on a ventilator prior to death (**S5D Fig**). We note that the causality of this association cannot be ascertained due to the retrospective nature of the dataset: it is unclear whether ventilator usage leads to lower *LRRC15* expression, or whether patients with conditions  
225 that subsequently require mechanical ventilation have baseline alterations in lung physiology associated with decreased *LRRC15* expression.

In order to gain further insight on *LRRC15* expression in the lung, we calculated the correlation between *LRRC15* and all other genes in the GTEx lung dataset. We observed that genes such as *SOX4*, *FRMD6*, *FAP*, *ENAH*, *PRRX1*, *CD200*, and *VCAM1*  
230 were positively correlated with *LRRC15* (**S5E Fig**). In contrast, *ACE2* was negatively correlated with *LRRC15* (**S5F Fig**), which is consistent with their distinct cell type-specific expression patterns (**S5A-B Fig**). We subsequently mapped these highly correlated genes to specific lung cell types, finding that fibroblasts and lymphatic endothelial cells also expressed several of the genes that were positively correlated with *LRRC15* (**S5G**  
235 **Fig**). We further observed that *MAOA*, which showed the strongest negative correlation with *LRRC15* in the bulk lung RNA-seq cohort, was mostly expressed in alveolar type 2 cells (**S5E Fig**).

To explore the clinical relevance of *LRRC15* to COVID-19 pathophysiology, we analyzed two independent scRNA-seq datasets of lungs from deceased COVID-19  
240 patients [36, 37]. Consistent with our analyses of non-COVID-19 lungs, we found that fibroblasts and lymphatic endothelial cells had the highest levels of *LRRC15* expression (**Fig 5A-B**). Interestingly, we observed that *LRRC15* expression was particularly enriched in the pathological fibroblast subpopulation. This recently identified fibroblast subset

(defined by high *CTHRC1* expression) has been implicated as a key contributor to  
245 idiopathic pulmonary fibrosis [38] and may also drive lung fibrosis in COVID-19 patients  
[36]. Indeed, the relative proportion of pathological fibroblasts and intermediate  
pathological fibroblasts was significantly increased in COVID-19 patients compared to  
controls (**Fig 5C**). Further supporting the association between *LRRC15* and disease-  
associated fibroblast cell states, there was a progressive gradient of *LRRC15* expression  
250 from alveolar fibroblasts (0.26%) to intermediate pathological fibroblasts (2.61%), and  
finally to pathological fibroblasts (4.52%).

Given that our experiments pointed to *LRRC15* as an antiviral restriction factor, we  
sought to specifically investigate whether *LRRC15* is associated with viral burden and  
disease progression in COVID-19 patients. We analyzed a bulk RNA-seq dataset of lungs  
255 from COVID-19 patients [39] with high or low SARS-CoV-2 viral burden at the time of  
autopsy. While patients with high vs low viral burden might correspond to two distinct  
disease phenotypes, patients with high viral RNA load had experienced shorter duration  
of illness before death, suggesting that these patients had failed to control the virus and  
died during the acute phase of infection [39]. On the other hand, patients with low viral  
260 RNA load had longer duration of illness before death, consistent with a scenario in which  
they had successfully controlled the virus but subsequently died from sequelae of the  
infection. With this framework in mind, we found that expression of *LRRC15* was  
significantly higher in patients with low SARS-CoV-2 viral burden (**Fig 5D**). Though the  
causality underlying this relationship is unclear, it is supportive of the antiviral function of  
265 *LRRC15* that we have identified here. Of note, SARS-CoV-2 infection of lung epithelial  
cell lines *in vitro* did not lead to significant changes in *LRRC15* expression (**Fig 5E**), which

is consistent with our prior analyses pointing to a fibroblast-specific role of *LRRC15* in COVID-19. Collectively, our analyses point to a model in which SARS-CoV-2 infection induces the emergence of a pathological fibroblast state with increased *LRRC15* expression.

### ***LRRC15* in ACE2-negative cells inhibits SARS-CoV-2 infection *in trans***

Since the scRNA-seq analysis revealed that *LRRC15* is not co-expressed with *ACE2* within the same cell types in the lung, we hypothesized that *LRRC15* inhibits SARS-CoV-2 entry into *ACE2*-positive cells *in trans*. To test this hypothesis, HeLa-*ACE2* cells were co-cultured with either HeLa-control or HeLa-sg*LRRC15* cells (i.e., *ACE2*-negative cells) and were subsequently infected with spike-pseudotyped viruses (**Fig 6A**). The GFP reporter signal was only detected in the *ACE2*<sup>+</sup> cells, confirming *LRRC15* alone does not permit viral entry (**S6A Fig**). Compared to the control HeLa cells, co-culturing with HeLa-sg*LRRC15* cells resulted in a significant reduction of viral entry in *ACE2*<sup>+</sup> cells when co-cultured at 1:4 ratio (**Fig 6B**). At two different titers of viral infection, the similar pattern of reduction was observed. The same trend of *trans*-inhibition was confirmed by the spike-pseudotyped viral infection with the delta (B.1.617.2) variant (**Fig 6C**). Co-culture of HeLa-*ACE2* cells and HeLa-sg*LRRC15* cells at 1:1 ratio exhibited significant restriction activities, although the magnitude of suppression is slightly weaker as expected (**S6B-C Fig**). Immunofluorescence staining with the co-culture model further confirmed the spike binding on *LRRC15*<sup>+</sup> cells and strong co-localization of *LRRC15* and spike on these cells (**Fig 6D**). Spike-pseudotyped virus-infected cells exhibited speckle-like staining patterns for spike. The co-culture condition with HeLa-sg*LRRC15* showed that a significant

290 proportion of spike speckles were detected on LRRC15+ cells. Most interestingly, spike  
speckles on the co-culture condition with HeLa-sgLRRC15 cells retained overtime without  
further entry progress, whereas the spike speckles rapidly disappeared in cells within 60  
min in the co-culture condition with wildtype HeLa cells (**Fig 6E**). These results indicate  
that spike-binding on LRRC15+ cells is not functional binding for entry, but for non-  
295 infectious sequestration of virions. Collectively, these results highlight the *trans*-inhibitory  
function of LRRC15 proven using a co-culture model, suggesting that expression of  
LRRC15 in SARS-CoV-2-non-permissive fibroblasts protects permissive cells against  
viral infection in the lung (**Fig 6F**).

## 300 **DISCUSSION**

In this study, we employed a *surfaceome* CRISPRa library to identify cellular  
receptors for SARS-CoV-2 by staining cells with a recombinant spike protein. The  
*surfaceome* screening revealed two distinct hits: ACE2, the *bona fide* entry receptor, and  
LRRC15, a novel inhibitory receptor. Binding assays using recombinant proteins in cells  
305 and in cell-free models showed that LRRC15 directly interacts with the RBD of spike with  
a moderate affinity ( $K_D = 43\sim 148$  nM, depending on domain and variant). Although ACE2  
also interacts with the spike via the RBD, the interaction of LRRC15-RBD does not  
compete with the interaction of ACE2-RBD or stabilize it either. Further studies will be  
necessary to determine the interface of LRRC15-RBD at a higher resolution. Most  
310 strikingly, LRRC15 inhibited the spike-mediated viral entry not only in the same cells, but  
also in neighboring cells *in trans*, providing a unique concept of viral entry inhibition by an  
inhibitory receptor.

The inhibition of viral entry by LRRC15 represents a direct effector by interacting with the spike protein itself. The leucine-rich repeat (LRR) domain is functionally linked with sensing of pathogen-associated molecular patterns (PAMPs) in a number of cases [40].  
315 The LRR domain proteins are highly conserved throughout evolution including in plants, providing a prominent protection against pathogens [41, 42]. Given the role of LRR domains in pattern recognition, humans might develop a pattern recognition protein for certain types of coronaviruses, in this case SARS-CoV-1 and -2. The robust and specific inhibitory effect of LRRC15 on multiple variants of SARS-CoV-2 and SARS-CoV-1 (but not MERS-CoV) suggests an arms race between humans and coronaviruses. While this manuscript was in preparation, LRRC15 was also identified as a SARS-CoV-2 spike binding factor in two preprints [43, 44]. This demonstrates the LRRC15-spike interaction is robust and detectable in multiple cell line models. Albeit the mechanism of viral restriction is different, several interferon-stimulated genes (ISGs) such as LY6E, CH25H, and IFITMs are known to restrict coronavirus entry by interfering with spike protein-mediated membrane fusion [45-47] or by interfering with endosome-mediated processes [48, 49]. Unlike these ISGs, LRRC15-mediated inhibition of viral entry is directly mediated by interaction with the spike, which resembles PAMP receptors. LRRC15 is not induced  
325 by interferons (**S6D Fig**). As LRRC15 redistributes adenovirus receptor (CAR) affecting the delivery of adenovirus to cells, it seems that LRRC15 may act as an antiviral factor via different modes [50]. It remains to be elucidated whether LRRC15 requires intracellular signaling through its cytosolic domain or requires other cellular proteins for the inhibition.  
330

335           The *trans*-inhibition of viral entry by LRRC15 is striking. The co-culture of  
ACE2+LRRC15- cells and ACE2-LRRC15+ cells exhibited a significant suppression of  
viral infection with spike proteins of two different SARS-CoV-2 variants, indicating the  
antiviral effect of LRRC15 can be broad in a physiological context. During SARS-CoV-2  
infection in the lung of human patients, LRRC15 may promote viral control by functioning  
340 as an entry inhibitor, likely in a non-cell-autonomous manner given that *ACE2* and  
*LRRC15* are expressed in distinct (but potentially neighboring) cell types. Thus, while the  
emergence of a *LRRC15*<sup>+</sup> pathological fibroblast population may ultimately drive the  
fibrotic changes observed in patients with COVID-19, these fibroblasts may initially play  
a protective role by contributing to viral clearance during the acute phase of infection  
345 through their expression of LRRC15 on cell surface, subsequently paving the way for the  
transition towards tissue repair and remodeling.

In conclusion, this work reveals that LRRC15 is a receptor for SARS-CoV-2 spike  
and represents a pattern-recognition-like inhibition of viral entry by directly interacting with  
the spike protein. This study provides an insight into therapeutic development and a better  
350 understanding of COVID-19.



## MATERIALS AND METHODS

355

### Cell culture

HEK293T (#CRL-3216), HeLa (#CCL-2), and A375 (#CRL-1619) cells were purchased from ATCC. Cells were cultured in Dulbecco's Modified Eagle Medium (DMEM, Gibco, #11995-081) supplemented with 10% fetal bovine serum (FBS) and 2.5% HEPES (Gibco, #15630-080) and detached using 0.05% trypsin-EDTA with phenol red (Gibco, #25300-120). After transfection, viral production media (DMEM with 10% FBS, 2.5% HEPES, and 1% bovine serum albumin) was used for lentiviral production. For A375 cells, 5 µg/mL blasticidin (Gibco, #A1113903) and 1 µg/mL puromycin (Gibco, #A1113803) were added as appropriate. For HeLa cells, 5 µg/mL blasticidin, 0.7 µg/mL puromycin, 200 or 400 µg/mL hygromycin (Gibco, #0-687-010), and 100 µg/mL zeocin (Thermo, #R25001) were added as appropriate.

### Generation of genetically modified cell lines

Individual sgRNAs (sgLRRC15 #1: GACATGCAGGCACTGCACTG; sgLRRC15 #2: AGTGTCAGCCCGGGACATGC; sgACE2: GTTACATATCTGTCCTCTCC) targeting the candidate genes were cloned into linearized pXPR\_502 (Addgene, #96923) for CRISPR activation. Media was replaced with viral production media 12 hours after transfection. The supernatant was collected, spun at 4347 x g, and filtered using a 0.45 µm filter (Millipore) 36 hours after transfection. A375-dCas or HeLa-dCas cells were generated by transducing with pLenti-dCas9-VP64-Blast (Addgene, #61425). After 7 days of blasticidin selection, cells were transduced with 1 mL of harvested lentiviral stock and spun at 1200

x g for 90 minutes at 35°C. Cells were given 2 mL of fresh media and were incubated for 6 or 18 hours after spin transduction. Puromycin was used to select for successfully transduced cells.

380 Stable ACE2 expressing HeLa cells (HeLa-ACE2) were generated by transducing HeLa-dCas cells with pLENTI\_hACE2\_HygR (Addgene, #155296) followed selection with hygromycin. To generate a clonal cell line, transduced cells were plated in 96-well plates at single cell dilutions. After propagating the cells, each clone was screened for surface ACE2 expression by flow cytometry, and a clone with the highest ACE2 expression was  
385 selected and used for subsequent experiments.

For ectopic expression of LRRC15, a lentiviral vector pCDH-MSCV-T2A-Puro (System Biosciences, #CD522A-1) was modified to enable zeocin selection instead of puromycin. A codon-optimized LRRC15 ORF was cloned into pCDH-MSCV-T2A-Zeo with a C-terminal 3xFLAG tag and used to transduce HeLa-ACE2 followed by zeocin selection.

390

### **CRISPR activation screen for SARS-CoV-2 spike binding**

A list of 6011 surface proteins was obtained by integrating four datasets for plasma membrane proteins [51-54]. Four sgRNA sequences targeting each gene were picked from Calabrese genome-wide CRISPRa library [55] and 1,000 non-targeting control  
395 sgRNAs were included. The sgRNAs were cloned into pXPR\_502 (Addgene, #96923) with assistance from the Genome Engineering and iPSC Center (GEiC) at Washington University in Saint Louis.

$7.8 \times 10^7$  A375-dCas cells were transduced with the CRISPRa library at  $\sim 0.3$  MOI to make  $2.4 \times 10^7$  transduced cells, which is sufficient for the integration of each sgRNA into  $\sim 500$

400 cells. At two days post transduction, puromycin was added and cells were selected for over a week.

For SARS-CoV-2 spike S1-Fc binding screen,  $5 \times 10^7$  cells per sample were washed with FACS buffer (1x PBS supplemented with 2% FBS and 1 mM EDTA) and incubated with 50  $\mu\text{g}/\text{mL}$  SARS-CoV-2 spike S1 subunit-Fc fusion protein (R&D systems, #10623-CV-405 100) or human IgG1 isotype control (BioXCell, #BE0297) for 30 min at  $4^\circ\text{C}$ . After washing two times with FACS buffer, cells were stained with PE-conjugated anti-human IgG antibody (Southern Biotech, #9040-09) for 30 min at  $4^\circ\text{C}$ . Then the cells were washed two times with FACS buffer, fixed with 4% formaldehyde and subjected to sorting using FACS Aria III (BD Biosciences). The top  $\sim 3\%$  (fluorescence intensity) of the PE-positive 410 cells were isolated. As a control, a same number of cells were stained with BV421 anti-hCD45 antibody (Biolegend, #368522) and the top 3% of the BV421-positive cells were sorted. Genomic DNA (gDNA) was extracted from the isolated cells and unsorted cells (“Input”) with QIAamp DNA Maxi kit (Qiagen, #51104).

#### 415 **CRISPR screen sequencing and analysis**

For Illumina sequencing, gDNA was used for PCR to amplify the integrated sgRNA sequences. PCR was performed in 96-well plates and each well containing up to 10  $\mu\text{g}$  of gDNA in a total of 100  $\mu\text{L}$  reaction mixture consisting of Titanium Taq DNA polymerase buffer and enzyme (Takara, #639209), deoxynucleoside triphosphate, dimethylsulfoxide 420 (5%), P5 stagger primer mix (0.5  $\mu\text{M}$ ) and uniquely barcoded P7 primer (0.5  $\mu\text{M}$ ). Samples were amplified with following PCR cycles: an initial 5 min at  $95^\circ\text{C}$ ; followed by 28 or 30 cycles of  $95^\circ\text{C}$  for 30 s,  $59^\circ\text{C}$  for 30 s, and  $72^\circ\text{C}$  for 20 s; followed by a final 10 min at

72°C. PCR products from two wells per sample were pooled and purified with AMPure XP beads according to the manufacturer's protocol (Beckman Coulter, #MSPP-A63880).  
425 Samples were sequenced on a NextSeq550 sequencer (Illumina). After demultiplexing according to the barcode sequences, reads were mapped to a reference file of sgRNAs in the surface CRISPRa library using LibraryAligner (<https://gitlab.com/buchserlab/library-aligner>). We calculated the log-fold change of sgRNAs in each sample relative to the unsorted cells and calculated the hypergeometric distribution to determine p-values.

430

### **Flow cytometry**

For SARS-CoV-2 spike subunit binding assay, cells were washed once with HBSS containing 2% FBS and incubated with 50 µg/mL S1-Fc, 200 µg/mL RBD-Fc (Sino biological, #40592-V08H) or NTD-Fc (Sino biological, #40591-V49H) for 30 min at 4°C,  
435 followed by washing two times with HBSS with 2% FBS. Cells were incubated with PE anti-human IgG for another 30 min at 4°C, washed two times, and fixed with 4% formaldehyde for 15 min. Cells were washed once, resuspended in HBSS with 2% FBS and analyzed by flow cytometry using FACSCelesta (BD Biosciences). To measure the surface expression of ACE2 and LRRC15, cells were washed with FACS buffer (1x PBS  
440 supplemented with 2% FBS and 1 mM EDTA) and stained with goat anti-ACE2 (R&D Systems, #AF933) at a 1:50 dilution or rabbit anti-LRRC15 (abcam, #ab150376) at a 1:100 dilution for 30 min at 4°C. Then the cells were washed two times and resuspended in FACS buffer containing the secondary antibodies at a 1:1000 dilution: AF647-labeled donkey anti-goat IgG (Invitrogen, #A32849) or AF488-labeled goat anti-rabbit IgG  
445 (Invitrogen, #A32731). After 30 min incubation at 4°C, the cells were washed two times,

fixed with 4% formaldehyde for 15 min and washed and resuspended in FACS buffer before analyzing by flow cytometry using FACSCelesta (BD Biosciences) or Cytex Aurora spectral analyzer (Cytex Biosciences). Data was analyzed with Flowjo software.

#### 450 **ELISA binding assay**

To investigate the binding of LRRC15 to SARS-CoV2 spike proteins, ELISA assays were performed on immobilized spike protein-Fc. To this aim, 96-well Immulon 2HB flat bottom plates (Thermo) were coated with 2 µg/mL spike proteins with C-terminal Histidine (BEI resources, NR-55438, NR-55311, NR-55310, NR-52724, NR-53769, and NR-55307, NR-455 55614, and NR-53589) at 4°C overnight, followed by 1-hr blocking buffer containing 1x HBSS (Gibco, #14025-092) and 2% FBS (VWR, #104B16). The plates were then incubated with either ACE2-Fc (Sino biological, #10108-H02H, starting concentration, 10 µg/mL), LRRC15-Fc (Sino biological, #15786-H02H, 100 µg/mL) or human IgG1 isotype (BioXCell, #BE0297) (as negative control) serially diluted 4-fold for 2 hours. The plates 460 were then incubated with goat anti-human IgG Fc secondary antibody, HRP (Thermo, #A18817) at a 1:3000 dilution for 1 hour at room temperature. Next, TMB substrate (Thermo Scientific, #ENN301) was added to the plates and then quenched with stop solution (Thermo Scientific, #PIN600). Absorbance at 450 nm were recorded with a BioTek synergy HT microplate reader. Three washes were performed between every 465 incubation using 1x HBSS with 0.05% Tween-20. GraphPad Prism 9 software was used to perform nonlinear regression curve-fitting analyses of binding data to estimate dissociation constants ( $K_D$ ).

To determine which SARS-CoV-2 spike protein region contributes to the binding of LRRC15, the ELISA was performed by coating 96 well plates with 2 µg/mL LRRC15-His  
470 (AcroBio, #LR5-H52H3) in coating buffer (BD, #51-2713KC) overnight at 4°C. Following blocking with 2% FBS, the 4-fold serially diluted SARS-CoV-2 spike RBD-Fc recombinant protein (Sino biological, #40592-V02H) and SARS-CoV-2 spike S1 NTD-Fc (Sino biological, #40591-V41H) were added and incubated for 2 hours at room temperature. After washing, the HRP labeled goat anti-human IgG Fc secondary antibody was added  
475 and incubated for 1 hour. Subsequently, TMB substrate was added, and the enzymatic reaction was stopped by adding stop solution. The signal was read at 450 nm.

To compare the binding affinity of LRRC15 and ACE2 with other coronaviruses, the 96-well plates were coated overnight at 4°C with 2 µg/mL LRRC15-His or ACE2-His (Sino biological, #10108-H08H). This was followed by blocking with 2% FBS for 1 h at room  
480 temperature. Then either rabbit Fc tagged-MERS-CoV spike/RBD protein fragment (Sino biological, #40071-V31B1) or SARS-CoV spike/RBD protein fragment (Sino biological, #40150-V31B2) were 4-fold serially diluted (starting concentration, 16 µg/mL) and added on the plate for 2-hour incubation. Later, goat anti-rabbit IgG-HRP conjugate (Southern Biotech, #4030-05) diluted (1:3000) in HBSS was used to detect the bound MERS or  
485 SARS-CoV RBD fragment. The reaction of HRP with TMB developed a colorimetric signal. The absorbance value was read at 450 nm after adding stop solution.

To determine whether LRRC15 binds to ACE2, 96-well plates were coated with either 2 µg/mL LRRC15-His, spike glycoprotein from SARS-CoV-2 with C-terminal histidine (BEI resources, NR-53589) or spike glycoprotein from MERS-CoV, England 1 with C-terminal  
490 histidine (BEI resources, NR-53591) and incubated overnight at 4°C. After blocking at

room temperature for 1 h with 2% FBS in HBSS, the ELISA plates were washed, and 4-fold serially diluted ACE2-Fc (starting from 160 µg/mL) were added for a 2-hr incubation. HRP-conjugated goat anti-human IgG Fc secondary antibody was used to detect the bound ACE2.

495

### **ELISA competition assay**

The ACE2-Fc were serially diluted 4-fold starting from 40 µg/mL. Each dilution was mixed with different concentrations of LRRC15-His (0, 1250, 5000, and 20000 ng/mL). These sample series were transferred to the plate which coated with spike glycoprotein from SARS-CoV-2, Wuhan-Hu-1 with C-terminal histidine (BEI resources, NR-53947) at 4°C, overnight. After 2 hours incubation, the wells were treated with goat anti-human IgG Fc secondary antibody, HRP at a 1:3000 dilution for 1 hour at room temperature. Chromogenic development was generated with TMB substrate and quenched with stop solution. Optical density was measured in a BioTek synergy HT microplate reader.

505

### **Pseudovirus production**

VSV-dG pseudoviral particles were produced as previously described [31]. Briefly,  $8 \times 10^6$  HEK293T cells were plated in 10-cm tissue culture dishes and transfected using Lipofectamine2000 (Invitrogen) with plasmids encoding different CoV spike proteins or VSV-G protein. Expression vectors for SARS-CoV-2 Wuhan-Hu-1 (Addgene, #149539), SARS-CoV-2 B.1.167.2 (Addgene, #172320), SARS-CoV-2 B.1.1.7 (Addgene, #170451), SARS-CoV-2 B.1.351 (Addgene, #170449), SARS-CoV-2 P.1 (Addgene, #170450), SARS-CoV-1 (Addgene, #170447), MERS-CoV (Addgene, #170448) and VSV-G

(Addgene, #12259) were used. At 24 h post transfection, cells were incubated with  
515 replication restricted rVSVΔG\*G-GFP virus (Kerafast, #EH1019-PM) at ~5 MOI for 1 h at  
37°C, 5% CO<sub>2</sub> and the media was replaced with complete media. Anti-VSV-G (Sigma,  
#MABF2337) was added at final concentration of 1 μg/mL to neutralize residual  
rVSVΔG\*G. At ~24 h post inoculation, viral supernatant was harvested, cell debris were  
removed by centrifuging for 10 min at 1320 x g, and stored at -80°C in small aliquots.

520

### **Pseudovirus entry assay**

Cells were plated at  $1 \times 10^5$  cells per well in 24-well plates or  $2 \times 10^4$  cells per well in 96-  
well plates. The following day, media was removed from the cells and 150 μL or 50 μL of  
pseudotyped VSV were added. After incubating 1 h at 37°C, 5% CO<sub>2</sub>, virus-containing  
525 media was removed and the cells were incubated in complete media for 20~24 h at 37°C,  
5% CO<sub>2</sub>. Cells were washed once and resuspended with FACS buffer and GFP-positive  
cells were measured by flow cytometry using FACSCelesta (BD Biosciences). For  
neutralization assay, SARS-CoV-2 spike-pseudotyped VSV was preincubated with serial  
3-fold dilutions of ACE2-Fc, LRRC15-Fc, or human IgG control for 1 h at 37°C, 5% CO<sub>2</sub>  
530 before adding to the cells.

### **Pseudovirus attachment assay**

$2 \times 10^5$  cells were incubated with 150 μL of VSV pseudotyped with SARS-CoV-2 spike in  
microcentrifuge tubes for 1 h on ice. Then the cells were washed three times with chilled  
535 complete media to remove unattached viral particles. The cells were lysed in TRIzol and



subjected to RNA extraction. The viral copies were measured by RT-qPCR with primers targeting VSV-N mRNA and normalized to the expression of Actin.

### **Quantitative Reverse Transcription-PCR**

540 As previously described [56], RNA extraction for cell samples was performed using TRI Reagent with a Direct-zol-96 RNA Kit (Zymo Research), following the manufacturer's protocol. The ImProm-II reverse transcriptase system (Promega) was used with random hexamers and 5  $\mu$ L of extracted RNA to synthesize cDNA. qPCR assays for VSV were performed using SYBR dye and primers targeting VSV-N (primer 1: 5'-  
545 TGTCTACCAAGGCCTCAAATC-3'; primer 2: 5'-GTGTTCTGCCCACTCTGTATAA-3'). Predesigned PrimeTime qPCR assays (IDT) were used to quantify expression of human genes: *ACTB* (Hs.PT.39a.22214847), *LRRC15* (Hs.PT.58.26559170), *MX1* (Hs.PT.58.26787898), and *IFI44* (Hs.PT.58.21412074). A standard curve was used to determine absolute gene copy. qPCR results were normalized to the housekeeping gene  
550 *ACTB*.

### **Analysis of human lung scRNA-seq datasets**

Human lung scRNA-seq datasets from non-COVID-19 patients were accessed from the Human Lung Cell Atlas (<https://github.com/krasnowlab/HLCA>) (Synapse #syn21041850),  
555 and from the Tissue Stability Cell Atlas (<https://www.tissuestabilitycellatlas.org/>) (PRJEB31843). Preprocessed R objects were downloaded from the respective repositories and utilized for analysis of cell type-specific expression patterns using Seurat [57].

Human lung scRNA-seq datasets from deceased COVID-19 patients and non-COVID-19  
560 controls were accessed from the Single Cell Portal of the Broad Institute. We downloaded  
the preprocessed data from Melms et al [36] (SCP1219) and Delorey et al [37] (SCP1052).  
For both datasets, we used Seurat to filter out all annotated doublets prior to investigating  
cell type-specific expression patterns. We also filtered out cells from non-COVID-19  
patients for visualization of *ACE2* and *LRRC15* expression. For the Melms dataset, we  
565 also compared the relative proportions of each of the fibroblast subpopulations among  
total fibroblasts, using a two-tailed unpaired Mann-Whitney test to assess statistical  
significance.

### **Analysis of bulk RNA-seq datasets**

570 The Genotype-Tissue Expression (GTEx) project was supported by the Common Fund  
of the Office of the Director of the National Institutes of Health, and by NCI, NHGRI, NHLBI,  
NIDA, NIMH, and NINDS [35, 58]. Bulk RNA-seq normalized TPM matrices were  
accessed from the GTEx Portal (<https://gtexportal.org/home/datasets>) on March 18, 2020,  
release v8 and subsequently filtered to lung samples only. Gene expression data used in  
575 this study are publicly available on the web portal and have been de-identified. Detailed  
clinical annotations of the GTEx cohort were obtained as controlled access data through  
dbGaP (phs000424.v8.p2).

To test the association between various clinical factors and *LRRC15* expression in the  
GTEx cohort, we employed a similar approach as previously described [59], constructing  
580 a multivariable linear regression model using age, sex, diabetes (type 1 or type 2),  
hypertension, body mass index (BMI), smoking, and ventilator status at time of death as

predictor variables for log-transformed *LRRC15* expression. The resulting regression estimates were visualized as forest plots with 95% confidence intervals. To visualize *LRRC15* expression values after adjustment for all other clinical covariates except ventilator status, we summed the intercept and residuals from another multivariable linear regression model, omitting ventilator status as a predictor variable.

For analysis of genes correlated with *LRRC15* expression in the GTEx dataset, we computed the Spearman correlation between *LRRC15* and all other genes represented in the GTEx dataset. We performed multiple-hypothesis correction by the Benjamini-Hochberg method. For direct comparison of *ACE2* and *LRRC15* expression, we utilized log-transformed expression values to compute the linear regression line with 95% confidence intervals.

To compare *LRRC15* expression in the lungs of deceased COVID-19 patients with high vs low viral load [39], we accessed the raw count data from GSE150316 and performed differential expression analysis using DESeq2 [60]. We performed multiple-hypothesis correction by the Benjamini-Hochberg method.

To compare *LRRC15* expression in lung cell lines infected with SARS-CoV-2 vs mock controls [61], we accessed the raw count data from GSE147507 and performed differential expression analysis using DESeq2 as above. For visualization purposes, we further extracted the normalized expression values for *LRRC15* in each of the samples and tested for statistical significance by two-tailed unpaired t-test.

### **Trans-inhibition assay**

4 x 10<sup>3</sup> HeLa-ACE2 cells and 1.6 x 10<sup>4</sup> HeLa or HeLa-sgLRRC15 cells (1:4 ratio) were  
605 co-plated per well in 96-well plates. For 1:1 ratio co-culture, 1 x 10<sup>4</sup> HeLa-ACE2 cells and  
1 x 10<sup>4</sup> HeLa or HeLa-sgLRRC15 cells were plated per well. The following day, media  
was removed from the cells and 50 µL of pseudotyped VSV were added. After incubating  
1 h at 37°C, 5% CO<sub>2</sub>, virus-containing media was removed and the cells were incubated  
in complete media for 20 h at 37°C, 5% CO<sub>2</sub>. Cells were washed once and resuspended  
610 with FACS buffer and GFP-positive cells were measured by flow cytometry using  
FACSCelesta (BD Biosciences). To compare GFP expressions in ACE2- and LRRC15-  
positive cells, pseudovirus-infected cells were stained for surface ACE2 and LRRC15 as  
described above with following secondary antibodies: AF405-labeled donkey anti-goat  
IgG (Invitrogen, #A48259) and PE-labeled donkey anti-rabbit IgG (Jackson  
615 ImmunoResearch, #7111-116-152).

### **Microscopic analysis**

8 x 10<sup>3</sup> HeLa-ACE2 cells and 3.2 x 10<sup>4</sup> HeLa or HeLa-sgLRRC15 cells (1:4 ratio) were  
co-plated per well in 8-well chamber slides (Nunc). The following day, cells were  
620 inoculated with 75 µL of SARS-CoV-2 pseudovirus for 1 h on ice. Cells were washed  
three times with chilled media to remove unattached viral particles and placed back to  
37°C, 5% CO<sub>2</sub> to allow internalization. At 0, 30, or 60 min after internalization, cells were  
fixed by incubation of 4% paraformaldehyde in PBS for 15 min at room temperature and  
permeabilized with 0.1% Triton X-100 for 10 min. Cells were subsequently incubated with  
625 recombinant anti-LRRC15 antibody (Abcam, #ab150376) and SARS-CoV-2 spike  
antibody [1A9] (GeneTex, #GTX632604) at 1:100, followed by incubation with 1:500-

diluted Alexa Fluor 555 conjugated goat anti-rabbit IgG antibody (Abcam, #ab150078) and 1:200-diluted Alexa Fluor 488 conjugated goat anti-mouse IgG antibody (Abcam, #ab150117) for 60 min at room temperature. The coverslips were mounted on a slide  
630 using prolong™ glass antifade mountant with NucBlue™ (Invitrogen, #P36981). The fluorescence images were recorded using a Zeiss microscope.

### **Interferon stimulation**

3 x 10<sup>5</sup> A375 cells were plated per well in 24-well plates. The following day, Universal  
635 IFN-I (R&D systems, #11200-1) or IFN-λ2 (R&D systems, #8417-IL-025/CF), was added at 100 U/mL or 100 ng/mL, respectively, and incubated at 37°C, 5% CO<sub>2</sub>. After 6-h incubation, cells were harvested and subjected to RNA extraction and qPCR analysis as described above.

### **640 Statistical analysis**

Statistical significance was determined using GraphPad Prism 9 software. Experiments were analyzed by one-way or two-way ANOVA with Dunnett's multiple comparisons test or unpaired two-pair t test as indicated.

645 **ACKNOWLEDGMENTS**

We thank Robert Orchard for manuscript review and discussion. We also thank Megan Baldridge, Rachel Rodgers, Leran Wang, and William Buchser for helping to establish the bioinformatic analysis pipeline. We acknowledge the Brown University Flow Cytometry and Sorting Facility, the Genomics facility, the Leduc Bioimaging facility, and the  
650 Lentivirus Core for help with critical analysis. This study was supported by NIH grants R00 AI141683 (S.L.), K08 AI128043 (C.B.W), R01 AI148467 (C.B.W.), T32 GM007205 (R.D.C.), F30 CA250249 (R.D.C.) and P20 GM119943 (O.D.L.); the Smith Family Awards Program for Excellence in Biomedical Research (S.L.); a Burroughs Wellcome Fund Career Award for Medical Scientists (C.B.W.); the Ludwig Family Foundation (C.B.W.),  
655 the Mathers Charitable Foundation (C.B.W.); an Emergent Ventures fast grant (C.B.W).

**AUTHOR CONTRIBUTIONS**

Conceptualization, J.S., S.L.; Methodology, J.S., R.D.C., L.Z., E-Y.S., S.L.; Validation, J.S., M.P-H., L.Z., S.A.L.; Investigation, J.S., S.L.; Resources, E-Y.S., O.D.L., C.B.W.,  
660 S.L.; Writing – Original Draft, J.S., R.D.C., L.Z., S.A.L., S.L.; Writing – Review & Editing, M.P-H., E-Y.S., O.D.L., C.B.W.; Funding Acquisition, C.B.W., S.L.; Supervision, C.B.W., S.L.

**DECLARATION OF INTERESTS**

665 Yale (CBW) has a patent pending title “Compounds and Compositions for Treating, Ameliorating, and/or Preventing SARS-CoV-2 Infection and/or Complications Thereof.”

## REFERENCES

1. Zhu N, Zhang D, Wang W, Li X, Yang B, Song J, et al. A Novel Coronavirus from Patients with Pneumonia in China, 2019. *N Engl J Med.* 2020;382(8):727-33. Epub 20200124. doi: 10.1056/NEJMoa2001017. PubMed PMID: 31978945; PubMed Central PMCID: PMC7092803.  
670
2. Li Q, Guan X, Wu P, Wang X, Zhou L, Tong Y, et al. Early Transmission Dynamics in Wuhan, China, of Novel Coronavirus-Infected Pneumonia. *N Engl J Med.* 2020;382(13):1199-207. Epub 20200129. doi: 10.1056/NEJMoa2001316. PubMed PMID: 31995857; PubMed Central PMCID: PMC7121484.  
675
3. Wu F, Zhao S, Yu B, Chen YM, Wang W, Song ZG, et al. A new coronavirus associated with human respiratory disease in China. *Nature.* 2020;579(7798):265-9. Epub 20200203. doi: 10.1038/s41586-020-2008-3. PubMed PMID: 32015508; PubMed Central PMCID: PMC7094943.
4. Lu R, Zhao X, Li J, Niu P, Yang B, Wu H, et al. Genomic characterisation and epidemiology of 2019 novel coronavirus: implications for virus origins and receptor binding. *Lancet.* 2020;395(10224):565-74. Epub 20200130. doi: 10.1016/S0140-6736(20)30251-8. PubMed PMID: 32007145; PubMed Central PMCID: PMC7159086.  
680
5. Li W, Moore MJ, Vasilieva N, Sui J, Wong SK, Berne MA, et al. Angiotensin-converting enzyme 2 is a functional receptor for the SARS coronavirus. *Nature.* 2003;426(6965):450-4. doi: 10.1038/nature02145.  
685
6. Walls AC, Park Y-J, Tortorici MA, Wall A, McGuire AT, Veerler D. Structure, Function, and Antigenicity of the SARS-CoV-2 Spike Glycoprotein. *Cell.* 2020;181(2):281-92.e6. doi: 10.1016/j.cell.2020.02.058.  
690
7. Belouzard S, Millet JK, Licitra BN, Whittaker GR. Mechanisms of Coronavirus Cell Entry Mediated by the Viral Spike Protein. *Viruses.* 2012;4(6):1011-33. doi: 10.3390/v4061011.
8. Lan J, Ge J, Yu J, Shan S, Zhou H, Fan S, et al. Structure of the SARS-CoV-2 spike receptor-binding domain bound to the ACE2 receptor. *Nature.* 2020;581(7807):215-20. doi: 10.1038/s41586-020-2180-5.  
695
9. Hoffmann M, Kleine-Weber H, Schroeder S, Krüger N, Herrler T, Erichsen S, et al. SARS-CoV-2 Cell Entry Depends on ACE2 and TMPRSS2 and Is Blocked by a Clinically Proven Protease Inhibitor. *Cell.* 2020;181(2):271-80.e8. doi: 10.1016/j.cell.2020.02.052.
10. Wrapp D, Wang N, Corbett KS, Goldsmith JA, Hsieh C-L, Abiona O, et al. Cryo-EM structure of the 2019-nCoV spike in the prefusion conformation. *Science.* 2020;367(6483):1260-3. doi: 10.1126/science.abb2507.  
700

- 705 11. Hoffmann M, Kleine-Weber H, Pöhlmann S. A Multibasic Cleavage Site in the Spike Protein of SARS-CoV-2 Is Essential for Infection of Human Lung Cells. *Molecular Cell*. 2020;78(4):779-84.e5. doi: 10.1016/j.molcel.2020.04.022.
12. Ou X, Liu Y, Lei X, Li P, Mi D, Ren L, et al. Characterization of spike glycoprotein of SARS-CoV-2 on virus entry and its immune cross-reactivity with SARS-CoV. *Nature Communications*. 2020;11(1):1620. doi: 10.1038/s41467-020-15562-9.
- 710 13. Wang Q, Zhang Y, Wu L, Niu S, Song C, Zhang Z, et al. Structural and Functional Basis of SARS-CoV-2 Entry by Using Human ACE2. *Cell*. 2020;181(4):894-904 e9. Epub 20200409. doi: 10.1016/j.cell.2020.03.045. PubMed PMID: 32275855; PubMed Central PMCID: PMC7144619.
- 715 14. Dinno KH, 3rd, Leist SR, Schafer A, Edwards CE, Martinez DR, Montgomery SA, et al. A mouse-adapted model of SARS-CoV-2 to test COVID-19 countermeasures. *Nature*. 2020;586(7830):560-6. Epub 20200827. doi: 10.1038/s41586-020-2708-8. PubMed PMID: 32854108; PubMed Central PMCID: PMC7144619.
- 720 15. Leist SR, Dinno KH, 3rd, Schafer A, Tse LV, Okuda K, Hou YJ, et al. A Mouse-Adapted SARS-CoV-2 Induces Acute Lung Injury and Mortality in Standard Laboratory Mice. *Cell*. 2020;183(4):1070-85 e12. Epub 20200923. doi: 10.1016/j.cell.2020.09.050. PubMed PMID: 33031744; PubMed Central PMCID: PMC7144619.
16. Corti D, Purcell LA, Snell G, Vesler D. Tackling COVID-19 with neutralizing monoclonal antibodies. *Cell*. 2021;184(17):4593-5. doi: 10.1016/j.cell.2021.07.027. PubMed PMID: 34416148; PubMed Central PMCID: PMC7144619.
- 725 17. Zang R, Castro MFG, McCune BT, Zeng Q, Rothlauf PW, Sonnek NM, et al. TMPRSS2 and TMPRSS4 promote SARS-CoV-2 infection of human small intestinal enterocytes. *Science Immunology*. 2020;5(47). doi: 10.1126/sciimmunol.abc3582.
- 730 18. Zhao M-M, Yang W-L, Yang F-Y, Zhang L, Huang W-J, Hou W, et al. Cathepsin L plays a key role in SARS-CoV-2 infection in humans and humanized mice and is a promising target for new drug development. *Sig Transduct Target Ther*. 2021;6(1):1-12. doi: 10.1038/s41392-021-00558-8.
19. Cantuti-Castelvetri L, Ojha R, Pedro LD, Djannatian M, Franz J, Kuivanen S, et al. Neuropilin-1 facilitates SARS-CoV-2 cell entry and infectivity. *Science*. 2020;370(6518):856-60. doi: 10.1126/science.abd2985.
- 735 20. Daly JL, Simonetti B, Klein K, Chen K-E, Williamson MK, Antón-Plágaro C, et al. Neuropilin-1 is a host factor for SARS-CoV-2 infection. *Science*. 2020;370(6518):861-5. doi: 10.1126/science.abd3072.
21. Clausen TM, Sandoval DR, Spliid CB, Pihl J, Perrett HR, Painter CD, et al. SARS-CoV-2 Infection Depends on Cellular Heparan Sulfate and ACE2. *Cell*. 2020;183(4):1043-57.e15. doi: 10.1016/j.cell.2020.09.033.



- 740 22. Lempp FA, Soriaga L, Montiel-Ruiz M, Benigni F, Noack J, Park Y-J, et al. Lectins enhance SARS-CoV-2 infection and influence neutralizing antibodies. *Nature*. 2021;1-9. doi: 10.1038/s41586-021-03925-1.
23. Wang S, Qiu Z, Hou Y, Deng X, Xu W, Zheng T, et al. AXL is a candidate receptor for SARS-CoV-2 that promotes infection of pulmonary and bronchial epithelial cells. *Cell Res*. 2021;31(2):126-40. doi: 10.1038/s41422-020-00460-y.
- 745 24. Wang K, Chen W, Zhang Z, Deng Y, Lian J-Q, Du P, et al. CD147-spike protein is a novel route for SARS-CoV-2 infection to host cells. *Sig Transduct Target Ther*. 2020;5(1):283. doi: 10.1038/s41392-020-00426-x.
25. Cao S, Peterson SM, Muller S, Reichelt M, McRoberts Amador C, Martinez-Martin N. A membrane protein display platform for receptor interactome discovery. *Proc Natl Acad Sci U S A*. 2021;118(39). doi: 10.1073/pnas.2025451118. PubMed PMID: 34531301; PubMed Central PMCID: PMC8488672.
- 750 26. Purcell JW, Tanlimco SG, Hickson J, Fox M, Sho M, Durkin L, et al. LRRC15 Is a Novel Mesenchymal Protein and Stromal Target for Antibody-Drug Conjugates. *Cancer Res*. 2018;78(14):4059-72. Epub 20180515. doi: 10.1158/0008-5472.CAN-18-0327. PubMed PMID: 29764866.
- 755 27. Zhou P, Yang XL, Wang XG, Hu B, Zhang L, Zhang W, et al. A pneumonia outbreak associated with a new coronavirus of probable bat origin. *Nature*. 2020;579(7798):270-3. Epub 20200203. doi: 10.1038/s41586-020-2012-7. PubMed PMID: 32015507; PubMed Central PMCID: PMC7095418.
- 760 28. Soh WT, Liu Y, Nakayama EE, Ono C, Torii S, Nakagami H, et al. The N-terminal domain of spike glycoprotein mediates SARS-CoV-2 infection by associating with L-SIGN and DC-SIGN. 2020 2020/11/05/. Report No.
29. Case JB, Rothlauf PW, Chen RE, Kafai NM, Fox JM, Smith BK, et al. Replication-Competent Vesicular Stomatitis Virus Vaccine Vector Protects against SARS-CoV-2-Mediated Pathogenesis in Mice. *Cell Host Microbe*. 2020;28(3):465-74 e4. Epub 20200730. doi: 10.1016/j.chom.2020.07.018. PubMed PMID: 32798445; PubMed Central PMCID: PMC7391951.
- 765 30. Dieterle ME, Haslwanter D, Bortz RH, 3rd, Wirchnianski AS, Lasso G, Vergnolle O, et al. A Replication-Competent Vesicular Stomatitis Virus for Studies of SARS-CoV-2 Spike-Mediated Cell Entry and Its Inhibition. *Cell Host Microbe*. 2020;28(3):486-96 e6. Epub 20200703. doi: 10.1016/j.chom.2020.06.020. PubMed PMID: 32738193; PubMed Central PMCID: PMC7332447.
- 770 31. Condor Capcha JM, Lambert G, Dykxhoorn DM, Salerno AG, Hare JM, Whitt MA, et al. Generation of SARS-CoV-2 Spike Pseudotyped Virus for Viral Entry and Neutralization Assays: A 1-Week Protocol. *Front Cardiovasc Med*. 2021;0. doi: 10.3389/fcvm.2020.618651.
- 775

- 780 32. Müller MA, Raj VS, Muth D, Meyer B, Kallies S, Smits SL, et al. Human Coronavirus EMC Does Not Require the SARS-Coronavirus Receptor and Maintains Broad Replicative Capability in Mammalian Cell Lines. *mBio*. 2012;3(6):e00515-12. doi: 10.1128/mBio.00515-12.
- 785 33. Travaglini KJ, Nabhan AN, Penland L, Sinha R, Gillich A, Sit RV, et al. A molecular cell atlas of the human lung from single-cell RNA sequencing. *Nature*. 2020;587(7835):619-25. Epub 2020/11/20. doi: 10.1038/s41586-020-2922-4. PubMed PMID: 33208946; PubMed Central PMCID: PMC7704697.
- 790 34. Madisson E, Wilbrey-Clark A, Miragaia RJ, Saeb-Parsy K, Mahbubani KT, Georgakopoulos N, et al. scRNA-seq assessment of the human lung, spleen, and esophagus tissue stability after cold preservation. *Genome Biol*. 2019;21(1):1. Epub 2020/01/02. doi: 10.1186/s13059-019-1906-x. PubMed PMID: 31892341; PubMed Central PMCID: PMC6937944.
35. Consortium GT. The Genotype-Tissue Expression (GTEx) project. *Nat Genet*. 2013;45(6):580-5. Epub 2013/05/30. doi: 10.1038/ng.2653. PubMed PMID: 23715323; PubMed Central PMCID: PMC4010069.
- 795 36. Melms JC, Biermann J, Huang H, Wang Y, Nair A, Tagore S, et al. A molecular single-cell lung atlas of lethal COVID-19. *Nature*. 2021;595(7865):114-9. Epub 2021/04/30. doi: 10.1038/s41586-021-03569-1. PubMed PMID: 33915568.
- 800 37. Delorey TM, Ziegler CGK, Heimberg G, Normand R, Yang Y, Segerstolpe A, et al. COVID-19 tissue atlases reveal SARS-CoV-2 pathology and cellular targets. *Nature*. 2021;595(7865):107-13. Epub 2021/04/30. doi: 10.1038/s41586-021-03570-8. PubMed PMID: 33915569.
- 805 38. Tsukui T, Sun KH, Wetter JB, Wilson-Kanamori JR, Hazelwood LA, Henderson NC, et al. Collagen-producing lung cell atlas identifies multiple subsets with distinct localization and relevance to fibrosis. *Nat Commun*. 2020;11(1):1920. Epub 2020/04/23. doi: 10.1038/s41467-020-15647-5. PubMed PMID: 32317643; PubMed Central PMCID: PMC7174390.
39. Desai N, Neyaz A, Szabolcs A, Shih AR, Chen JH, Thapar V, et al. Temporal and spatial heterogeneity of host response to SARS-CoV-2 pulmonary infection. *Nat Commun*. 2020;11(1):6319. Epub 2020/12/11. doi: 10.1038/s41467-020-20139-7. PubMed PMID: 33298930; PubMed Central PMCID: PMC7725958.
- 810 40. Ng A, Xavier RJ. Leucine-rich repeat (LRR) proteins: integrators of pattern recognition and signaling in immunity. *Autophagy*. 2011;7(9):1082-4. Epub 20110901. doi: 10.4161/auto.7.9.16464. PubMed PMID: 21606681; PubMed Central PMCID: PMC3901792.
- 815 41. Sun Y, Zhu YX, Balint-Kurti PJ, Wang GF. Fine-Tuning Immunity: Players and Regulators for Plant NLRs. *Trends Plant Sci*. 2020;25(7):695-713. Epub 20200317. doi: 10.1016/j.tplants.2020.02.008. PubMed PMID: 32526174.

- 820 42. Istomin AY, Godzik A. Understanding diversity of human innate immunity receptors: analysis of surface features of leucine-rich repeat domains in NLRs and TLRs. *BMC Immunol.* 2009;10:48. Epub 20090903. doi: 10.1186/1471-2172-10-48. PubMed PMID: 19728889; PubMed Central PMCID: PMCPMC2747839.
43. Shilts J, Crozier TWM, Teixeira-Silva A, Gabaev I, Greenwood EJD, Watson SJ, et al. LRRC15 mediates an accessory interaction with the SARS-CoV-2 spike protein. *bioRxiv.* 2021:2021.09.25.461776. doi: 10.1101/2021.09.25.461776.
- 825 44. Loo L, Waller MA, Cole AJ, Stella AO, Moreno CL, Denes CE, et al. LRRC15 suppresses SARS-CoV-2 infection and controls collagen production. *bioRxiv.* 2021:2021.11.09.467981. doi: 10.1101/2021.11.09.467981.
45. Pfaender S, Mar KB, Michailidis E, Kratzel A, Boys IN, V'kovski P, et al. LY6E impairs coronavirus fusion and confers immune control of viral disease. *Nat Microbiol.* 2020;5(11):1330-9. doi: 10.1038/s41564-020-0769-y.
- 830 46. Zhao X, Zheng S, Chen D, Zheng M, Li X, Li G, et al. LY6E Restricts Entry of Human Coronaviruses, Including Currently Pandemic SARS-CoV-2. *Journal of Virology.* 2020;94(18):e00562-20. doi: 10.1128/JVI.00562-20.
- 835 47. Zang R, Case JB, Yutuc E, Ma X, Shen S, Castro MFG, et al. Cholesterol 25-hydroxylase suppresses SARS-CoV-2 replication by blocking membrane fusion. *PNAS.* 2020;117(50):32105-13. doi: 10.1073/pnas.2012197117.
48. Winstone H, Lista MJ, Reid AC, Bouton C, Pickering S, Galao RP, et al. The Polybasic Cleavage Site in SARS-CoV-2 Spike Modulates Viral Sensitivity to Type I Interferon and IFITM2. *Journal of Virology.* 95(9):e02422-20. doi: 10.1128/JVI.02422-20.
- 840 49. Shi G, Kenney AD, Kudryashova E, Zani A, Zhang L, Lai KK, et al. Opposing activities of IFITM proteins in SARS-CoV-2 infection. *EMBO J.* 2021;40(3):e106501. Epub 2020/12/04. doi: 10.15252/embj.2020106501. PubMed PMID: 33270927; PubMed Central PMCID: PMCPMC7744865.
- 845 50. O'Prey J, Wilkinson S, Ryan KM. Tumor antigen LRRC15 impedes adenoviral infection: implications for virus-based cancer therapy. *J Virol.* 2008;82(12):5933-9. Epub 20080402. doi: 10.1128/JVI.02273-07. PubMed PMID: 18385238; PubMed Central PMCID: PMCPMC2395123.
51. Uhlen M, Fagerberg L, Hallstrom BM, Lindskog C, Oksvold P, Mardinoglu A, et al. Proteomics. Tissue-based map of the human proteome. *Science.* 2015;347(6220):1260419. doi: 10.1126/science.1260419. PubMed PMID: 25613900.
- 850 52. Bausch-Fluck D, Hofmann A, Bock T, Frei AP, Cerciello F, Jacobs A, et al. A mass spectrometric-derived cell surface protein atlas. *PLoS One.* 2015;10(3):e0121314. Epub 20150420. doi: 10.1371/journal.pone.0121314. PubMed PMID: 25894527; PubMed Central PMCID: PMCPMC4404347.

53. Martinez-Martin N, Marcandalli J, Huang CS, Arthur CP, Perotti M, Foglierini M, et al. An Unbiased Screen for Human Cytomegalovirus Identifies Neuropilin-2 as a Central Viral Receptor. *Cell*. 2018;174(5):1158-71 e19. Epub 20180726. doi: 10.1016/j.cell.2018.06.028. PubMed PMID: 30057110.
54. UniProt C. UniProt: the universal protein knowledgebase in 2021. *Nucleic Acids Res*. 2021;49(D1):D480-D9. doi: 10.1093/nar/gkaa1100. PubMed PMID: 33237286; PubMed Central PMCID: PMCPCMC7778908.
55. Sanson KR, Hanna RE, Hegde M, Donovan KF, Strand C, Sullender ME, et al. Optimized libraries for CRISPR-Cas9 genetic screens with multiple modalities. *Nature Communications*. 2018;9(1):5416. doi: 10.1038/s41467-018-07901-8.
56. Lee S, Liu H, Wilen CB, Sychev ZE, Desai C, Hykes BL, et al. A Secreted Viral Nonstructural Protein Determines Intestinal Norovirus Pathogenesis. *Cell Host and Microbe*. 2019;25(6):845-57.e5. doi: 10.1016/j.chom.2019.04.005.
57. Hao Y, Hao S, Andersen-Nissen E, Mauck WM, 3rd, Zheng S, Butler A, et al. Integrated analysis of multimodal single-cell data. *Cell*. 2021;184(13):3573-87 e29. Epub 2021/06/02. doi: 10.1016/j.cell.2021.04.048. PubMed PMID: 34062119; PubMed Central PMCID: PMCPCMC8238499.
58. Carithers LJ, Ardlie K, Barcus M, Branton PA, Britton A, Buia SA, et al. A Novel Approach to High-Quality Postmortem Tissue Procurement: The GTEx Project. *Biopreserv Biobank*. 2015;13(5):311-9. Epub 2015/10/21. doi: 10.1089/bio.2015.0032. PubMed PMID: 26484571; PubMed Central PMCID: PMCPCMC4675181.
59. Chow RD, Majety M, Chen S. The aging transcriptome and cellular landscape of the human lung in relation to SARS-CoV-2. *Nat Commun*. 2021;12(1):4. Epub 2021/01/06. doi: 10.1038/s41467-020-20323-9. PubMed PMID: 33397975; PubMed Central PMCID: PMCPCMC7782551.
60. Love MI, Huber W, Anders S. Moderated estimation of fold change and dispersion for RNA-seq data with DESeq2. *Genome Biol*. 2014;15(12):550. Epub 2014/12/18. doi: 10.1186/s13059-014-0550-8. PubMed PMID: 25516281; PubMed Central PMCID: PMCPCMC4302049.
61. Blanco-Melo D, Nilsson-Payant BE, Liu WC, Uhl S, Hoagland D, Møller R, et al. Imbalanced Host Response to SARS-CoV-2 Drives Development of COVID-19. *Cell*. 2020;181(5):1036-45.e9. doi: 10.1016/j.cell.2020.04.026.

## FIGURE LEGEND

### **Fig 1. A surfaceome-focused CRISPR activation screen identified cellular receptors**

#### 890 **binding with SARS-CoV-2 spike protein**

(A) Schematic of a focused CRISPR activation screen for surface proteins interacting with SARS-CoV-2 spike S1-Fc fusion protein.

(B) Volcano plots showing sgRNAs enriched or depleted in cells binding with SARS-CoV-2 spike S1-Fc or human IgG isotype control. Results from two biologically independent  
895 replicates are shown.

### **Fig 2. LRRC15 binds with SARS-CoV-2 spike protein at the receptor-binding domain**

(A) A375 cells were transduced with indicated activating sgRNAs and incubated with  
900 SARS-CoV-2 spike S1-Fc fusion protein. Protein binding was measured by flow cytometry.

(B) HeLa cells were transduced with indicated activating sgRNAs and incubated with SARS-CoV-2 spike S1-Fc fusion protein. Protein binding was measured by flow cytometry.

(C) Dose-dependent binding of SARS-CoV-2 spike protein (Wuhan-Hu-1) to both ACE2 and LRRC15 with a Fc tag was determined by ELISA. Human IgG1 was included as a  
905 negative control. Dots indicate means of duplicates.

(D) HeLa cells were transduced with indicated activating sgRNAs and incubated with SARS-CoV-2 spike NTD-Fc or RBD-Fc fusion protein. Protein binding was measured by flow cytometry.

(E) The binding of the SARS-CoV-2 RBD and NTD to LRRC15 was measured by ELISA.

910

### **Fig 3. LRRC15 inhibits ACE2-mediated SARS-CoV-2 entry**

(A) HeLa-ACE2 cells were transduced with indicated activating sgRNAs and infected with VSV pseudoviruses, VSV $\Delta$ G-S-SARS2 or VSV $\Delta$ G-G. GFP signal was measured at 20 hpi by flow cytometry and normalized to mock control (n=4).

915 (B) HeLa-ACE2 cells expressing LRRC15 or empty vector were infected with VSV pseudoviruses and GFP signal was measured at 20 hpi by flow cytometry normalized to empty control (n=6 for VSV $\Delta$ G-S-SARS2 and n=5 for VSV $\Delta$ G-G).

(C) LRRC15-induced or mock HeLa-ACE2 cells were infected with VSV pseudoviruses harboring spike proteins of different SARS-CoV-2 variants. GFP signal was measured at  
920 20 hpi by flow cytometry (n=3).

(D) LRRC15-induced or mock HeLa-ACE2 cells were infected with VSV pseudoviruses harboring SARS-CoV-1 spike. GFP signal was measured at 20 hpi by flow cytometry (n=3).

Data represent means  $\pm$  SEM (A-D). Data were analyzed by one-way ANOVA with  
925 Dunnett's multiple comparisons test (A) or unpaired two-tailed t test (B-D). ns, not significant; \*p < 0.05; \*\*p < 0.01; \*\*\*\*p < 0.0001.

### **Fig 4. LRRC15 enhances SARS-CoV-2 attachment to the surface of ACE2-expressing cells**

930 (A) Cell surface expression of ACE2 was measured in HeLa-ACE2 cells transduced with indicated activating sgRNAs or a LRRC15-expressing vector.

(B) HeLa or HeLa-ACE2 cells transduced with indicated activating sgRNAs were incubated with VSV $\Delta$ G-S-SARS2 for 1 h on ice and washed three times with cold cell

culture media. Viral genome copies were quantified by RT-qPCR and normalized to  
935 HeLa-ACE2 cells (n=3).

(C) VSVΔG-S-SARS2 were incubated with ACE2-Fc, LRRC15-Fc, or IgG control for 1 h, prior to inoculating HeLa-ACE2 cells. Viral infectivity was quantified by measuring GFP signal at 20 hpi by flow cytometry and normalized to no antibody control (n=6). Statistical significance was determined compared to IgG control at each dilution.

940 (D) Competition assays between Fc-tagged ACE2 and His-tagged LRRC15 for immobilized His-tagged SARS-CoV2 spike protein. Premixture of LRRC15-His at 4 different concentrations with a dilution series of ACE2-Fc was added and anti-human HRP determined the amount of ACE2-Fc remaining in the presence of competitor LRRC15-His through a colorimetric readout.

945 Data represent means  $\pm$  SEM (B, C). Data were analyzed by one-way ANOVA (B) or two-way ANOVA (C) with Dunnett's multiple comparisons test. ns, not significant; \*p < 0.05; \*\*p < 0.01; \*\*\*p < 0.001; \*\*\*\*p < 0.0001.

**Fig 5. LRRC15 expression is enriched in the fibroblasts of COVID-19 patients and**  
950 **associated with reduced SARS-CoV-2 viral burden.**

(A-B) Cell type-specific expression of *ACE2* and *LRRC15*, assessed by scRNA-seq of lungs from deceased COVID-19 patients (A) Delorey et al, 2021 [37] or (B) Melms et al, 2021 [36].

(C) Boxplots of the relative frequencies of fibroblast subtypes among total fibroblasts, 955 comparing COVID-19 patients (blue) to non-COVID-19 controls (red). Statistical significance was assessed by two-tailed unpaired Mann-Whitney test.

(D) Volcano plot of differentially expressed genes in the lungs of deceased COVID-19 patients, comparing samples with high vs low SARS-CoV-2 RNA levels at the time of death [39]. Genes with positive  $\log_2$  fold changes are associated with high viral burden, while genes with negative  $\log_2$  fold changes are associated with low viral burden.

(E) *LRRC15* expression in lung cell lines (A549, A549-ACE2, Calu-3), comparing mock controls vs SARS-CoV-2 infected samples. Statistical significance was assessed by two-tailed unpaired Welch's t-test.

**Fig 6. LRRC15 inhibits ACE2-mediated SARS-CoV-2 entry *in trans***

(A) Schematic of trans-inhibition assay with ACE2+ and LRRC15+ cells.

(B) HeLa-ACE2 cells were co-cultured with HeLa or HeLa-sgLRRC15 cells at 1:4 ratio and infected with VSV pseudovirus harboring spike of SARS-CoV-2 Wuhan-hu-1 strain at high or low titer. GFP signal was measured at 20 hpi by flow cytometry (n=4).

Representative of three independent experiments are shown.

(C) Trans-inhibition assay was performed as in (B) with VSV pseudovirus harboring spike of SARS-CoV-2 Delta variant (B.1.617.2 strain) (n=4). Representative of three independent experiments are shown.

(D) Representative images of immunofluorescence staining of SARS-CoV-2 spike (green), LRRC15 (red), and DAPI (blue). HeLa-ACE2 cells were co-cultured with HeLa or HeLa-sgLRRC15 cells, inoculated with VSV $\Delta$ G-S-SARS2 for 1 h on ice and incubated at 37°C to allow internalization. Cells were harvested at indicated timepoints and subjected to staining. The white arrowheads indicate spikes. The scale bar indicates 20  $\mu$ m.



(E) Quantification was performed by calculating the number of spikes on LRRC15- or  
980 LRRC15+ cells per mm<sup>2</sup> area from multiple images per sample.

(F) Proposed working model of the LRRC15-mediated inhibition of SARS-CoV-2 entry.

Data represent means  $\pm$  SEM and were analyzed by unpaired two-tailed t test (B, C). \*p

< 0.05; \*\*\*p < 0.001; \*\*\*\*p < 0.0001.

## Fig 1

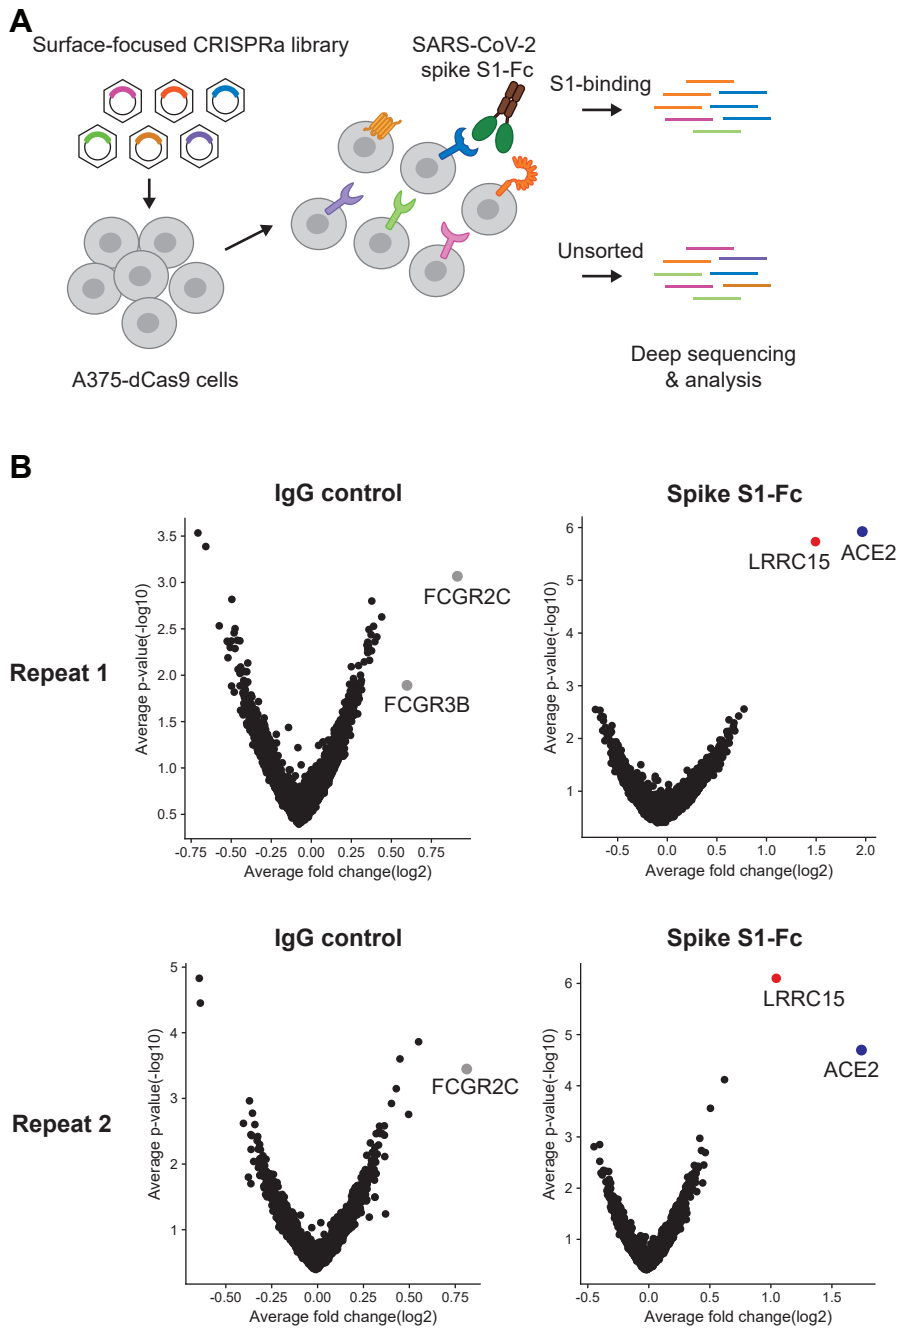

**Fig 2**

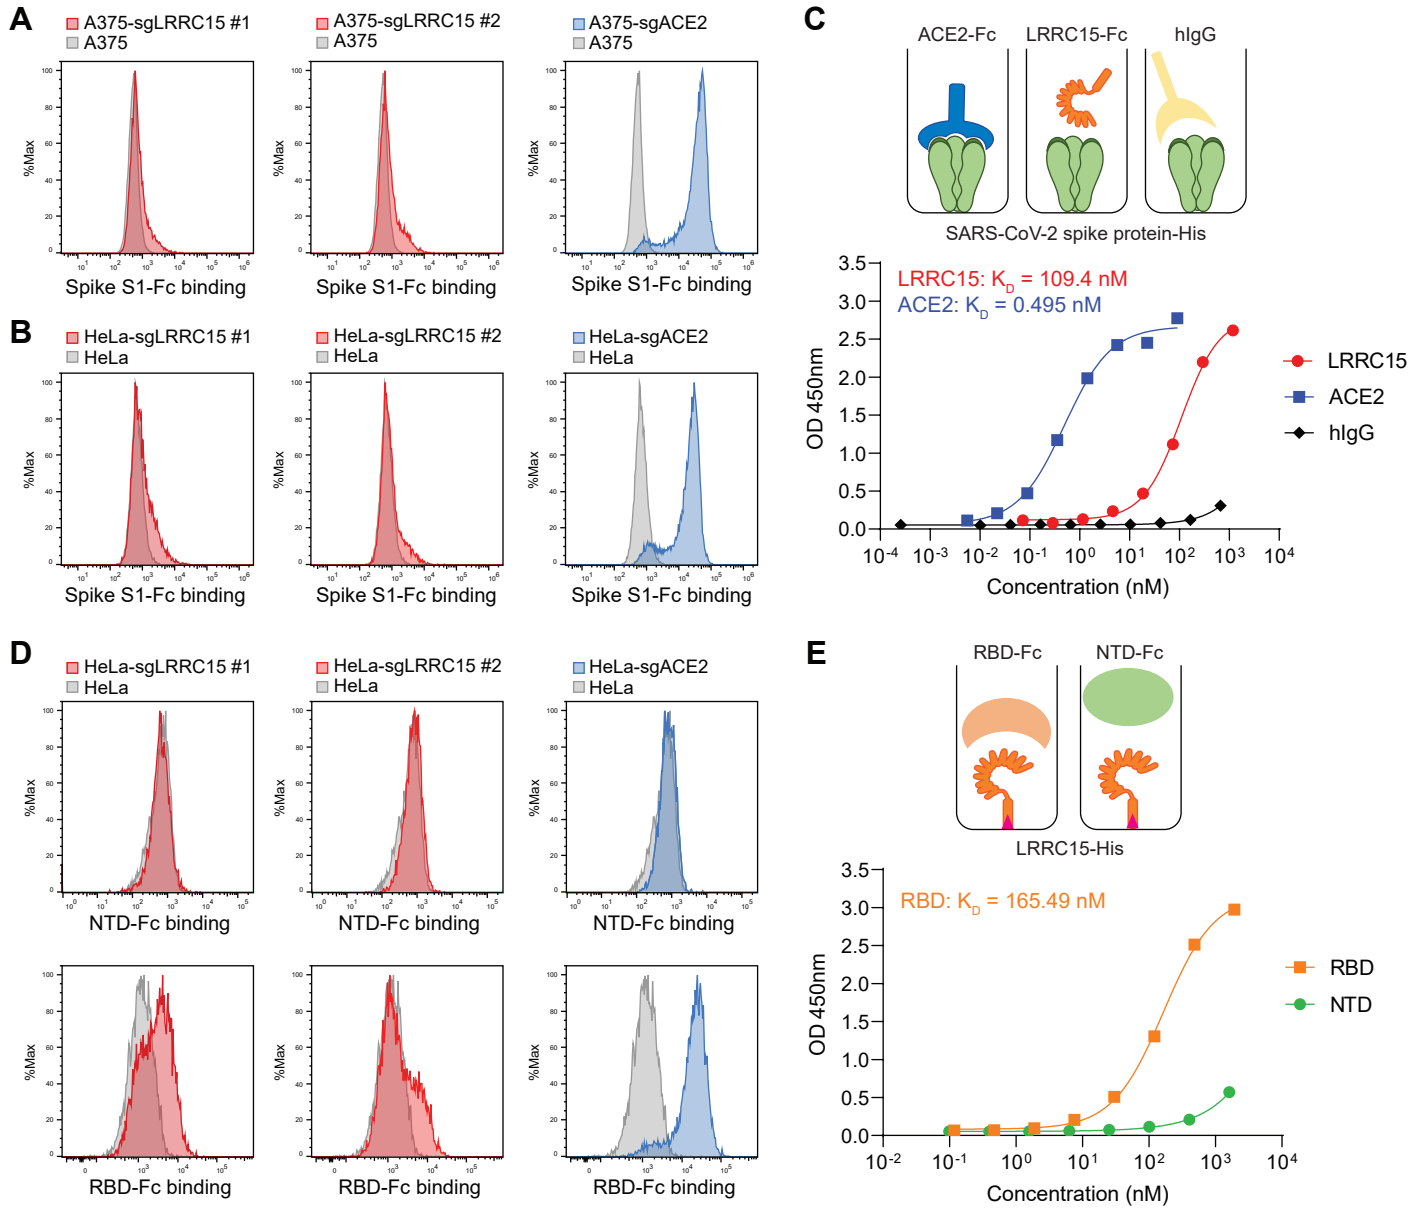

**Fig 3**

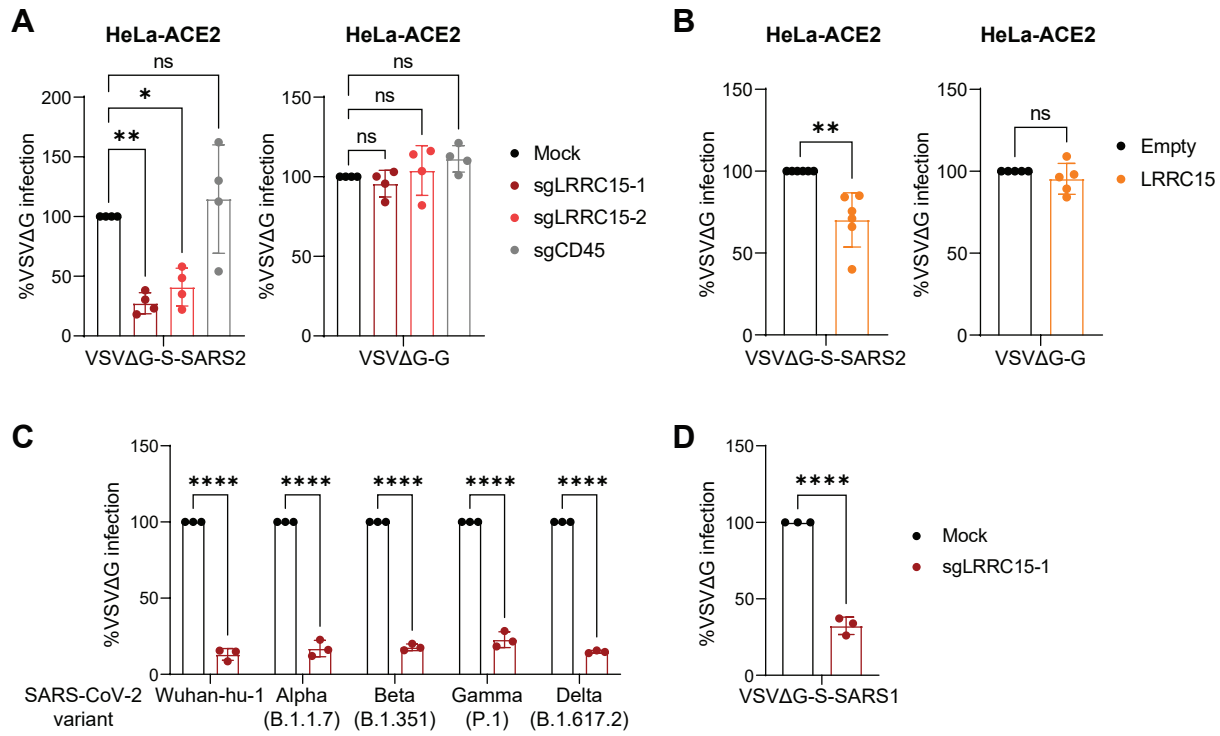

## Fig 4

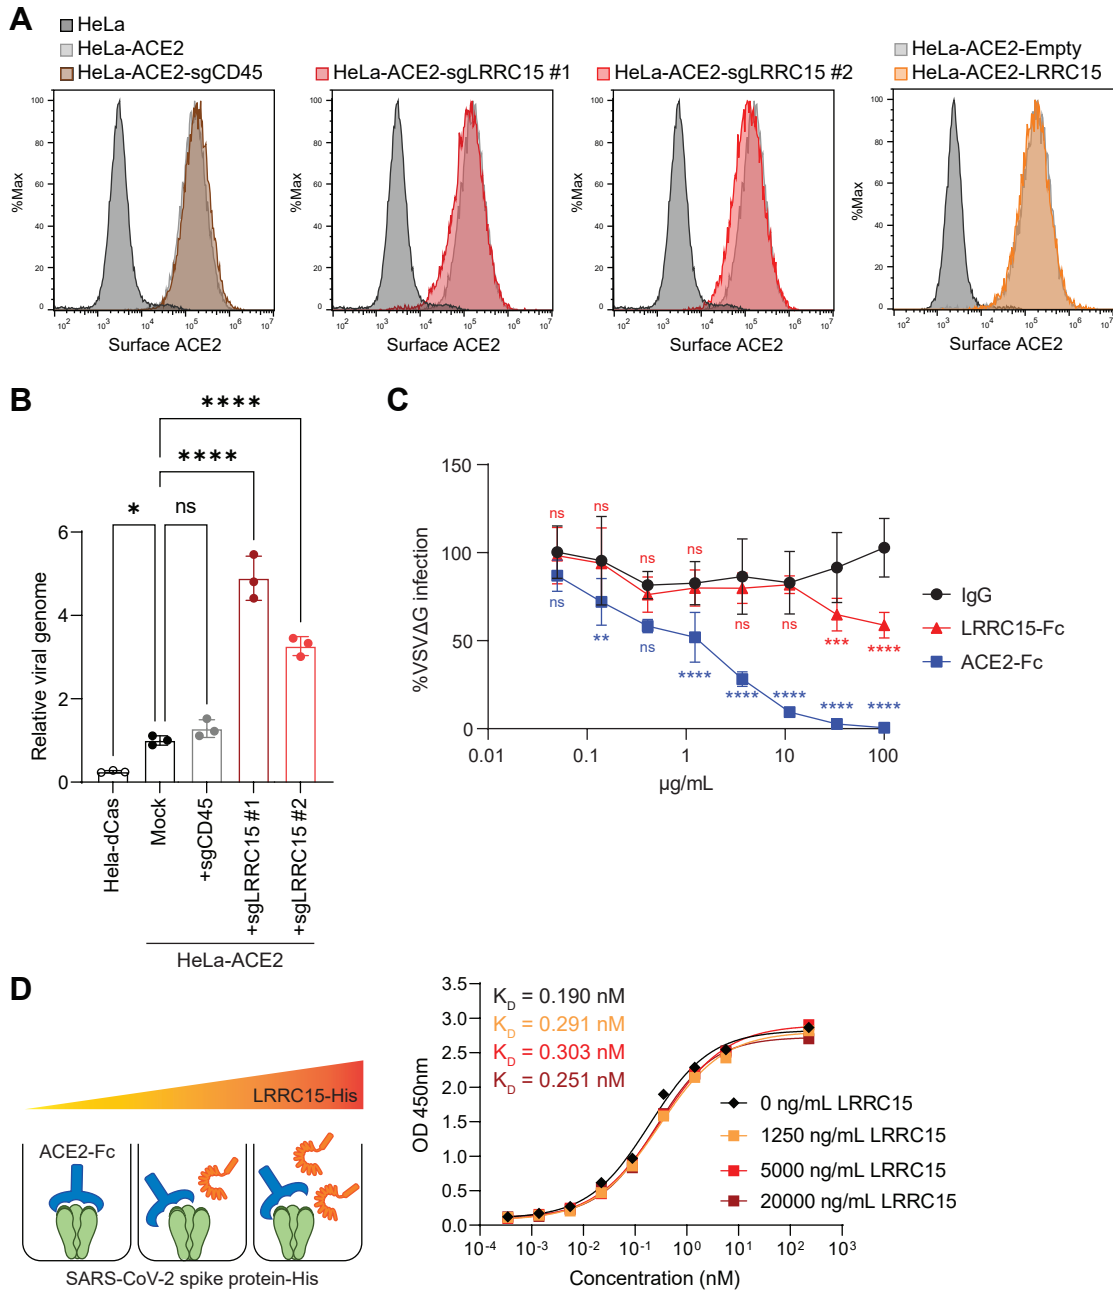

**Fig 5**

**A**

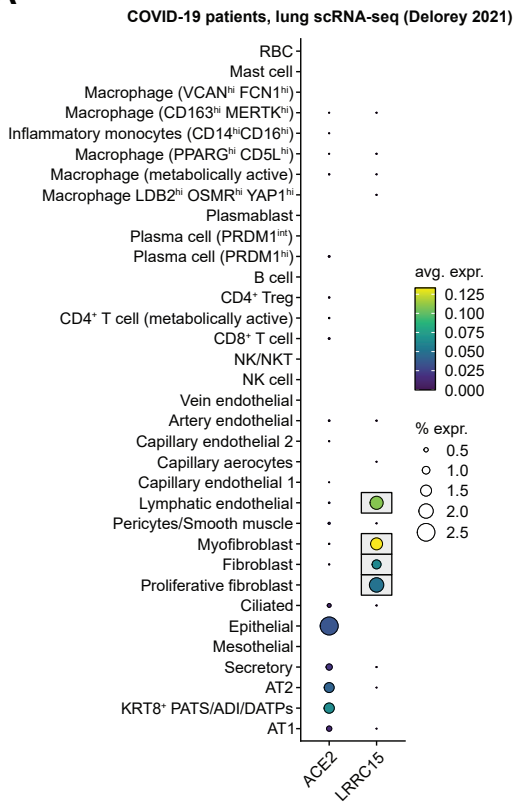

**B**

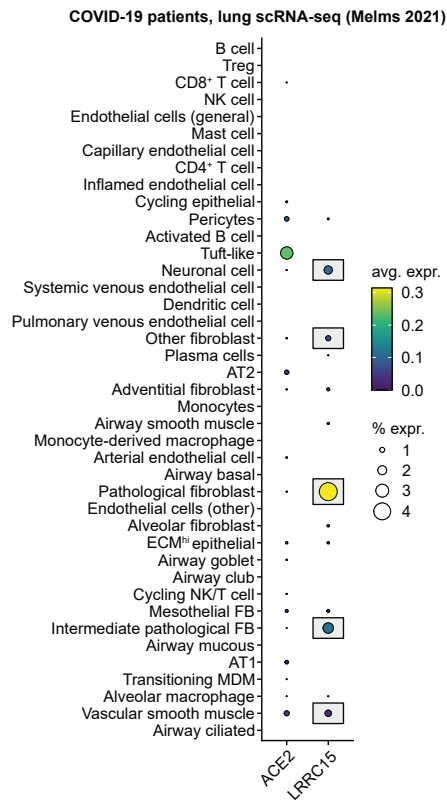

**C**

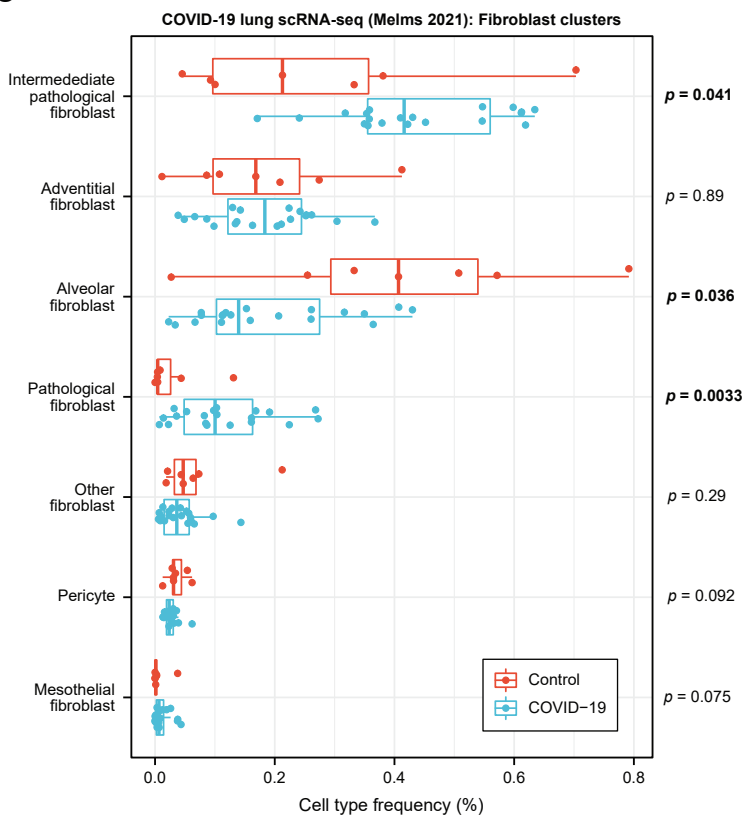

**D**

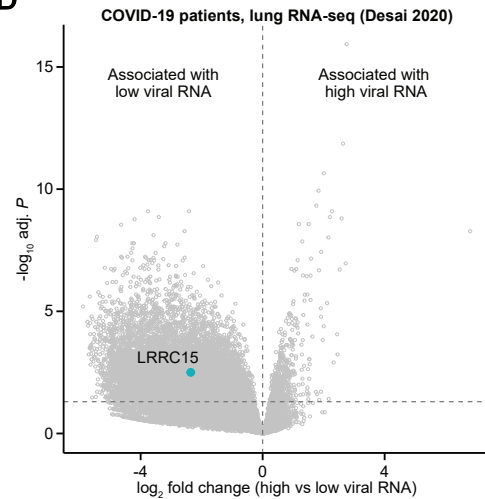

**E**

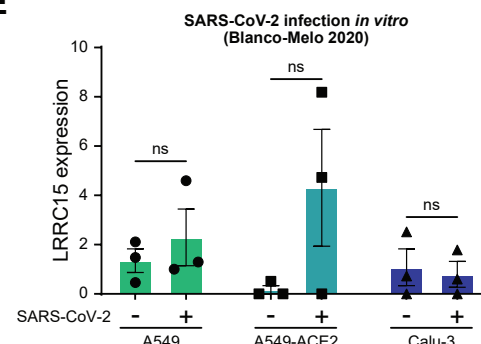

**Fig 6**

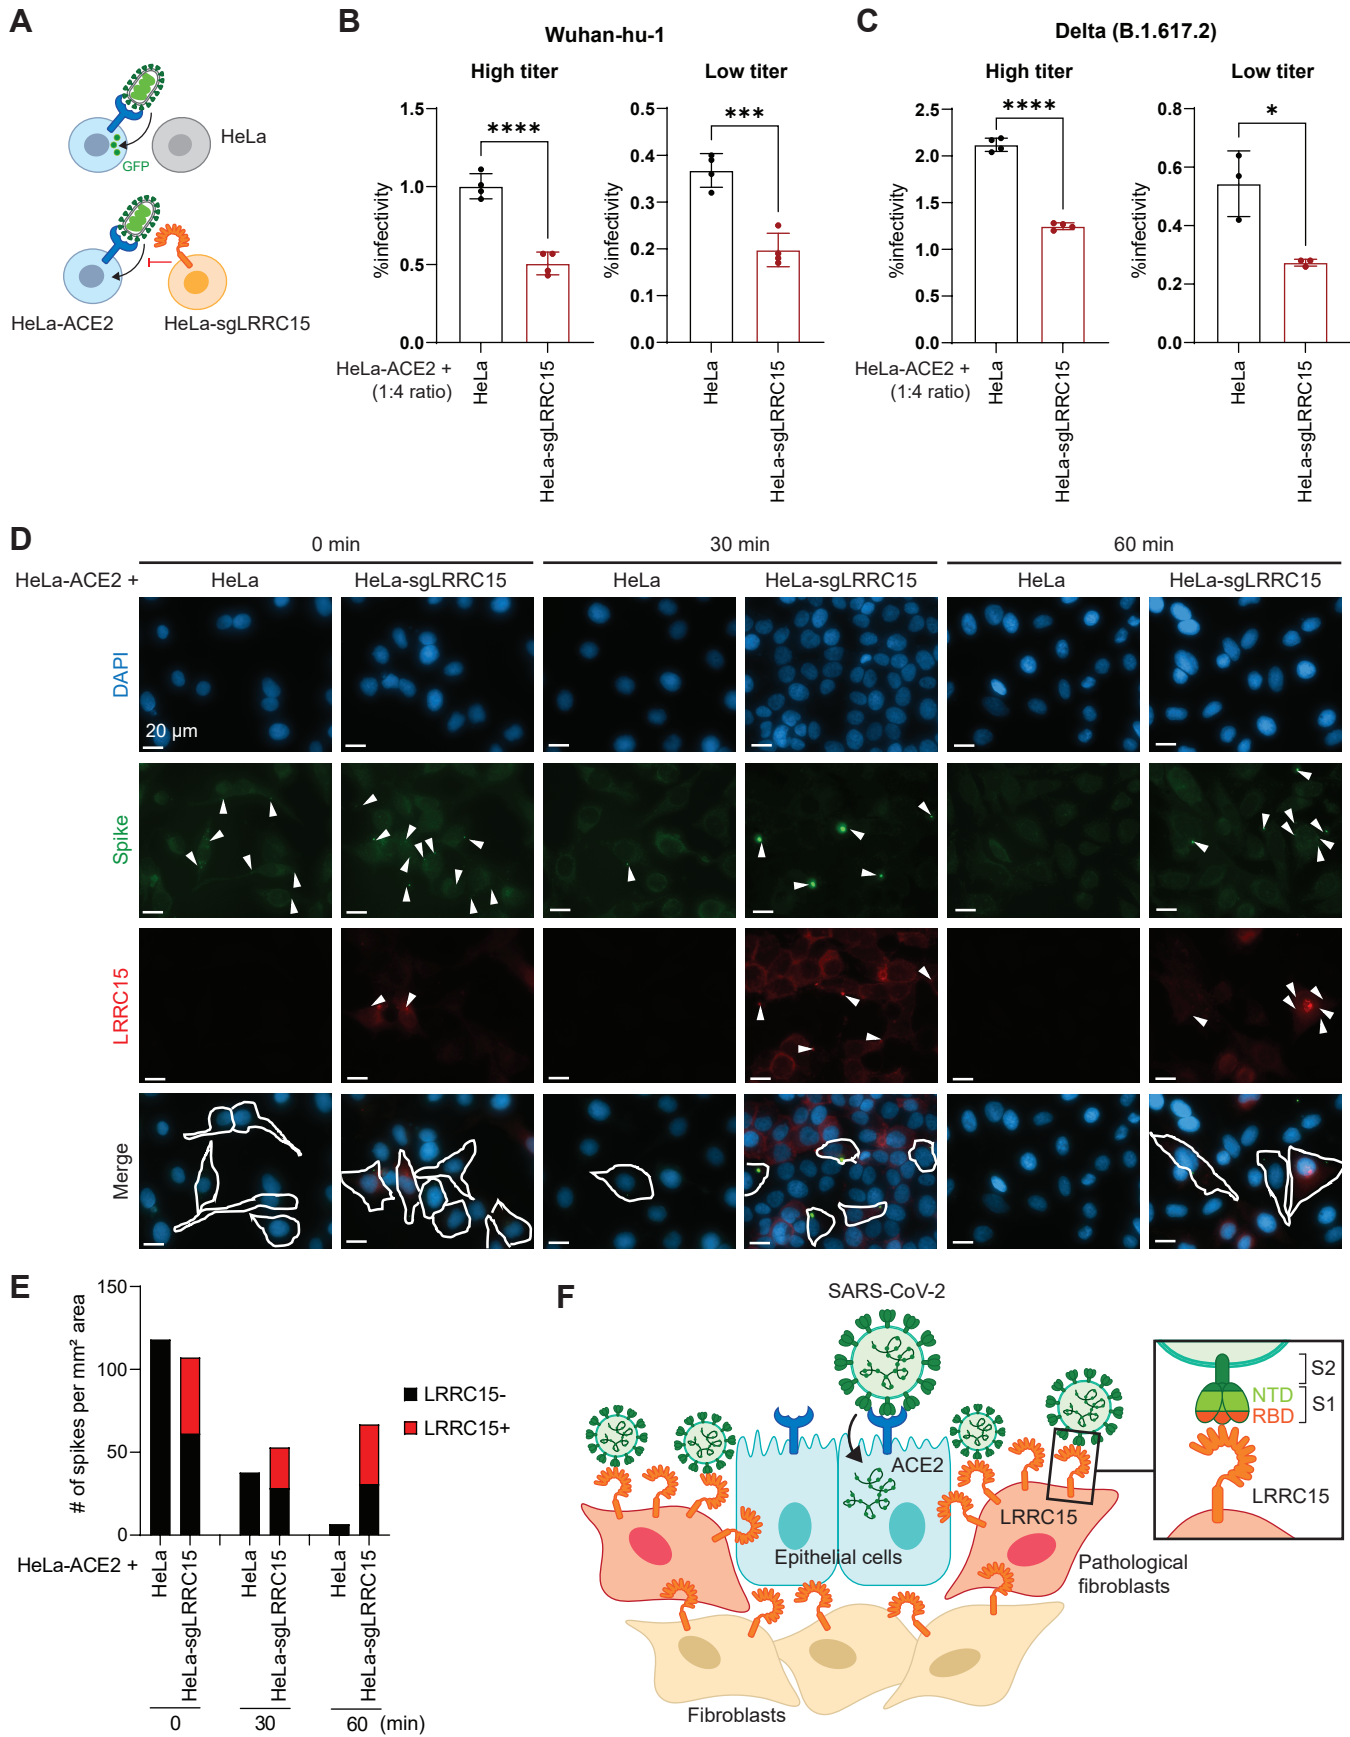

Source: https://www.biorxiv.org/content/10.1101/2021.11.23.469714v1.full.pdf
